# Supplementary material for: Population Genetic Structure and Potential Incursion Pathways of the Bluetongue Virus Vector Culicoides brevitarsis (Diptera: Ceratopogonidae) in Australia
Source: PubMed Central journal article supplement (PMC4714883; doi:10.1371/journal.pone.0146699), 2016-01-15
Supplement: pone.0146699.s001.pdf [file pone.0146699.s001.pdf]

**S1 File:** MtDNA COI partial sequence alignment in fasta+gap format of *Culicoides* species used in phylogenetic analysis.

```
>Cbrev-01 [GenBank:KP201844]
GCTATTTTATTATTATTATCTTTACCAGTATTAGCGGGAGCAATTACTATATTGTTAACG
GATCGAAATATTAATACTTCTTTTTTTGACCCGGCAGGAGGAGGTGATCCTATTTTATAC
CAACATTTATTTTGATTTTTTTGGTCACCCAGAAGTTTATATTTTAATTTTACCAGGATTT
GGGATTGTTTCTCATATTATTTGTCAAGAAAGAGGAAAAAAGAAGCTTTTGGAGTTTTA
GGTATAATATATGCTATTGCTGCAATTGGTTTATTAGGATTTATTGTTTGAGCTCATCAT
ATATTTACTGTTGGGTTAGATGTAGACACTCGAGCTTATTTTACTTCAGCTACTATAATT
ATTGCTGTTTCTACAGGGATTTAAATTTTTAGTTGAATAGCAACAATATATGGAAC TCAA
TTAAACCTT---ACTCCTGCTTTGTTATGATCTTTAGGGTTTGTATTTTTATTTACTGTA
GGAGGATTAACAGGTATTGTTTTAGCTAATTCCTCTTTAGATATTGTTTTACATGATACA
TATTATGTA
>Cbrev-02 [GenBank:KP201845]
GCTATTTTATTATTATTATCTTTACCAGTATTAGCGGGAGCAATTACTATATTGTTAACG
GATCGAAATATTAATACTTCTTTTTTTGACCCGGCAGGAGGAGGTGATCCTATTTTATAT
CAACATTTATTTTGATTTTTTTGGTCACCCAGAAGTTTATATTTTAATTTTACCAGGATTT
GGGATTGTTTCTCATATTATTTGTCAAGAAAGAGGAAAAAAGAAGCTTTTGGAGTTTTA
GGTATAATATATGCTATTGCTGCAATTGGTTTATTAGGATTTATTGTTTGAGCTCATCAT
ATATTTACTGTTGGGTTAGATGTAGACACTCGAGCTTATTTTACTTCAGCTACTATAATT
ATTGCTGTTTCTACAGGGATTTAAATTTTTAGTTGAATAGCAACAATATATGGAAC TCAA
TTAAACCTT---ACTCCTGCTTTGTTATGATCTTTAGGGTTTGTATTTTTATTTACTGTA
GGAGGATTAACAGGTATTGTTTTAGCTAATTCCTCTTTAGATATTGTTTTACATGATACA
TATTATGTA
>Cbrev-03 [GenBank:KP201846]
GCTATTTTATTATTATTATCTTTACCAGTATTAGCGGGAGCAATTACTATATTGTTAACG
GATCGAAATATTAATACTTCTTTTTTTGACCCGGCAGGAGGAGGTGATCCTATTTTATAC
CAACATTTATTTTGATTTTTTTGGTCACCCAGAAGTTTATATTTTAATTTTACCAGGATTT
GGGATTGTTTCTCATATTATTTGTCAAGAAAGAGGAAAAAAGAAGCTTTTGGAGTTTTA
GGTATAATATATGCTATTGCTGCAATTGGTTTATTAGGATTTATTGTTTGAGCTCATCAT
ATATTTACTGTTGGGTTAGATGTAGACACTCGAGCTTATTTTACTTCAGCTACTATAATT
ATTGCTGTTTCTACAGGGATTTAAATTTTTAGTTGAATAGCAACAATATATGGAAC TCAA
TTAAACCTT---ACTCCTGCTTTGTTATGATCTTTAGGGTTTGTATTTTTATTTACTGTA
GGAGGATTAACAGGTATTGTTTTAGCTAATTCCTCTTTAGATATTGTTTTACATGATACA
TATTATGTA
>Cbrev-04 [GenBank:KP201847]
GCTATTTTATTATTATTATCTTTACCAGTATTAGCGGGAGCAATTACTATATTGTTAACG
GATCGAAATATTAATACTTCTTTTTTTGATCCGGCAGGAGGAGGTGATCCTATTTTATAT
CAACATTTATTTTGATTTTTTTGGTCACCCAGAAGTTTATATTTTAATTTTACCAGGATTT
GGGATTGTTTCTCATATTATTTGTCAAGAAAGAGGAAAAAAGAAGCTTTTGGAGTTTTA
GGTATAATATATGCTATTGCTGCAATTGGTTTATTAGGATTTATTGTTTGAGCTCATCAT
ATATTTACTGTTGGGTTAGATGTAGACACTCGAGCTTATTTTACTTCAGCTACTATAATT
ATTGCTGTTTCTACAGGGATTTAAATTTTTAGTTGAATAGCAACAATATATGGAAC TCAA
TTAAACCTT---ACTCCTGCTTTGTTATGATCTTTAGGGTTTGTATTTTTATTTACTGTA
GGAGGATTAACAGGTATTGTTTTAGCTAATTCCTCTTTAGATATTGTTTTACATGATACA
TATTATGTA
>Cbrev-05 [GenBank:KP201849]
GCTATTTTATTATTATTATCTTTACCAGTATTAGCGGGAGCAATTACTATATTGTTAACG
GATCGAAATATTAATACTTCTTTTTTTGACCCGGCAGGAGGAGGTGATCCTATTTTATAC
CAACATTTATTTTGATTTTTTTGGTCACCCAGAAGTTTATATTTTAATTTTACCAGGATTT
GGGATTGTTTCTCATATTATTTGTCAAGAAAGAGGAAAAAAGAAGCTTTTGGAGTTTTA
GGTATAATATATGCTATTGCTGCAATTGGTTTATTAGGATTTATTGTTTGAGCTCATCAT
ATATTTACTGTTGGGTTAGATGTAGACACTCGAGCTTATTTTACTTCAGCTACTATAATT
ATTGCTGTTTCTACAGGGATTTAAATTTTTAGTTGAATAGCAACAATATATGGAAC TCAA
TTAAACCTT---ACTCCTGCTTTGTTATGATCTTTAGGGTTTGTATTTTTATTTACTGTA
GGAGGATTAACAGGTATTGTTTTAGCTAATTCCTCTTTAGATATTGTTTTACATGATACA
TATTATGTA
>Cbrev-06 [GenBank:KP201849]
GCTATTTTATTATTATTATCTTTACCAGTATTAGCGGGAGCAATTACTATATTGTTAACG
GATCGAAATATTAATACTTCTTTTTTTGACCCGGCAGGAGGAGGTGATCCTATTTTATAT
CAACATTTATTTTGATTTTTTTGGTCACCCAGAAGTTTATATTTTAATTTTACCAGGATTT
```

GGGATTGTTTCTCATATTATTTGTCAAGAAAGAGGAAAAAAGAAGCTTTTGGAGTTTTA  
GGTATAATATATGCTATTGCTGCAATTGGTTTATTAGGATTTATTGTTTGAGCTCATCAT  
ATATTTACTGTTGGGTTAGATGTAGACACTCGAGCTTATTTTACTTCAGCTACTATAATT  
ATTGCTGTTTCTACAGGGATTAAAATTTTTAGTTGAATAGCAACAATATATGGAACCAA  
TTAAACCTT---ACTCCTGCTTTGTTATGATCTTTAGGGTTTGTATTTTTTACTGTA  
GGAGGATTAACAGGTATTGTTTTAGCTAATTCCTTTAGATATTGTTTTACATGACACA  
TATTATGTA

>Cbrev-07 [GenBank:KP201850]

GCTATTTTATTATTATTATCTTTACCAGTATTAGCGGGAGCAATTACTATATTGTTAACG  
GATCGAAATATTAATACTTCTTTTTTTGATCCGGCAGGAGGAGGTGATCCTATTTTATAT  
CAACATTTATTTTGATTTTTTTGGTCACCCAGAAGTTTATATTTTAAATTTTACCAGGATTT  
GGAATTGTTTCTCATATTATTTGTCAAGAAAGAGGAAAAAAGAAGCTTTTGGAGTTTTA  
GGTATAATATATGCTATTGCTGCAATTGGTTTATTAGGATTTATTGTTTGAGCTCATCAT  
ATATTTACTGTTGGGTTAGATGTAGACACTCGAGCTTATTTTACTTCAGCTACTATAATT  
ATTGCTGTTTCTACAGGGATTAAAATTTTTAGTTGAATAGCAACAATATATGGAACCAA  
TTAAACCTT---ACTCCTGCTTTGTTATGATCTTTAGGGTTTGTATTTTTTACTGTA  
GGAGGATTAACAGGTATTGTTTTAGCTAATTCCTTTAGATATTGTTTTACATGATACA  
TATTATGTA

>Cbrev-08 [GenBank:KP201851]

GCTATTTTATTATTATTATCTTTACCAGTATTAGCGGGAGCAATTACTATATTGTTAACG  
GATCGAAATATTAATACTTCTTTTTTTGACCCGGCAGGAGGAGGTGATCCTATTTTATAT  
CAACATTTATTTTGATTTTTTTGGTCACCCAGAAGTTTATATTTTAAATTTTACCAGGATTT  
GGGATTGTTTCTCATATTATTTGTCAAGAAAGAGGAAAAAAGAAGCTTTTGGAGTTTTA  
GGTATAATATATGCTATTGCTGCAATTGGTTTATTAGGATTTATTGTTTGAGCTCATCAT  
ATATTTACTGTTGGGTTAGATGTAGACACTCGAGCTTATTTTACTTCAGCTACTATAATT  
ATTGCTGTTTCTACAGGGATTAAAATTTTTAGTTGAATAGCAACAATATATGGAACCAA  
TTAAACCTT---ACTCCTGCTTTGTTATGATCTTTAGGGTTTGTATTTTTTACTGTA  
GGAGGATTAACAGGTATTGTTTTAGCTAATTCCTTTAGATATTGTTTTACATGATACA  
TATTATGGA

>Cbrev-09 [GenBank:KP201852]

GCTATTTTATTATTATTATCTTTACCAGTATTAGCGGGAGCAATTACTATATTGTTAACG  
GATCGAAATATTAATACTTCTTTTTTTGACCCGGCAGGAGGAGGTGATCCTATTTTATAT  
CAACATTTATTTTGATTTTTTTGGTCACCCAGAAGTTTATATTTTAAATTTTACCAGGATTT  
GGGATTGTTTCTCATATTATTTGTCAAGAAAGAGGAAAAAAGAAGCTTTTGGAGTTTTA  
GGTATAATATATGCTATTGCTGCAATTGGTTTATTAGGATTTATTGTTTGAGCTCATCAT  
ATATTTACTGTTGGGTTAGATGTAGACACTCGAGCTTATTTTACTTCAGCTACTATAATT  
ATTGCTGTTTCTACAGGGATTAAAATTTTTAGTTGAATAGCAACAATATATGGAACCAA  
TTAAATCTT---ACTCCTGCTTTGTTATGATCTTTAGGGTTTGTATTTTTTACTGTA  
GGAGGATTAACAGGTATTGTTTTAGCTAATTCCTTTAGATATTGTTTTACATGATACA  
TATTATGTA

>Cmarks1-01 [GenBank:KP201853]

GCCATTTTATTATTTTTTATCTTTACCTGTTTTAGCTGGAGCTATTACTATACTTTTAACT  
GACCGTAATATTAATACTTCATTTTTTTGACCCAGCTGGAGGAGGAGACCCATTTTTATAC  
CAGCATTTATTTTGATTTTTTTGGACACCCAGAAGTTTATATTTTAAATTTTACCAGGATTT  
GGAATAATTTCTCATATTATTAGTCAAGAAAGTGGGAAAAAGGAAACCTTTGGGTCACCT  
GGAATAATTTATGCCATACTAGCAATTGGACTTTTAGGATTTATTGTATGAGCCACCAT  
ATATTTACTGTAGGAATAGACGTAGACACCCGAGCTTACTTTACTTCTGCTACAATAATT  
ATTGCTGTTTCTACAGGGATTAAAATTTTTAGTTGATTAGCCACTCTTCATGGAACACAA  
ATAACGCTT---AATCCATCTTTATTATGAGCTTTAGGGTTTGTATTCCTTATTCACAGTA  
GGAGGATTAACAGGTATTTTAGCAAATTCCTTCTATTGATATTGTATTACATGACACT  
TATTATGTA

>Cmarks1-03 [GenBank:KP201854]

GCCATTTTATTATTTTTTATCTTTACCTGTTTTAGCTGGAGCTATTACTATACTTTTAACT  
GACCGTAATATTAATACTTCATTTTTTTGACCCAGCTGGAGGAGGAGACCCATTTTTATAC  
CAGCATTTATTTTGATTTTTTTGGACATCCAGAAGTTTATATTTTAAATTTTACCAGGATTT  
GGGATAATTTCTCATATTATTAGCCAAGAAAGTGGAAAAAAGGAAACCTTTGGTTCACCT  
GGAATAATTTATGCCATACTAGCAATTGGACTTTTAGGATTTATTGTATGAGCCACCAT  
ATATTTACTGTAGGAATAGACGTAGACACCCGAGCTTACTTTACTTCTGCTACAATAATT  
ATTGCTGTTTCTACAGGGATTAAAATTTTTAGTTGATTAGCCACTCTTCATGGAACACAA  
ATAACGCTT---AATCCATCTTTATTATGAGCTTTAGGGTTTGTATTCCTTATTCACAGTA  
GGAGGATTAACAGGTATTTTAGCAAATTCCTTCTATTGATATTGTATTACATGACACT  
TATTATGTA

>Cmarks1-4 [GenBank:KP201855]

GCCATTTTATTATTTTTATCTTTACCTGTTTTAGCTGGAGCTATTACTATACTTTTAACT  
GACCGTAACATTAATACTTCATTTTTTGACCCAGCTGGAGGGGGGACCCATTTTTTATAC  
CAGCATTATTTTTGATTTTTTGACATCCAGAAGTTTATATTTTAAATTTTACCAGGATTT  
GGAATAATTTCTCATATTATTAGCCAAGAAAAGTGAAAAAAGGAAACCTTTGGGTCACCT  
GGAATAATTTATGCTATACTAGCAATTGGACTTTTAGGATTTATTGTATGAGCCCMCCAT  
ATATTTACTGTAGGAATAGACGTAGACACCCGAGCTTACTTTACTTCTGCTACAATAATT  
ATTGCTGTTCCCTACGGGGATTAAAATTTTTAGTTGACTAGCCACTCTTCATGGAACACAA  
ATAACGCTT---AATCCATCTTTATTATGAGCTTTAGGATTTGTATTCCTTATTCACAGTA  
GGAGGATTAACCTGGAGTTATCTTAGCAAATCTTCTATTGATATCGTATTACATGACACT  
TATTATGTA

>Cmarks1-05 [GenBank:KP201856]

GCCATTTTATTATTTTTATCTTTACCTGTTTTAGCGGGAGCTATTACTATACTTTTAACT  
GACCGTAATATTAATACTTCATTTTTTGACCCAGCTGGAGGAGGAGACCCATTTTTTATAC  
CAGCATTATTTTTGATTTTTTGCCATCCAGAAGTTTATATTTTAAATTTTACCAGGATTT  
GGGATAATTTCTCATATTATTAGCCAAGAAAAGTGAAAAAAGGAAACCTTTGGTTCACCT  
GGAATAATTTATGCCATACTAGCAATTGGACTTTTAGGATTTATTGTATGAGCCCMCCAT  
ATATTTACTGTAGGAATAGACGTAGACACCCGAGCTTACTTTACTTCTGCTACAATAATT  
ATTGCTGTTCCCTACGGGGATTAAAATTTTTAGTTGATTAGCCACTCTTCATGGAACACAA  
ATAACGCTT---AATCCATCTTTATTATGAGCTTTAGGGTTTGTATTCCTTATTCACAGTA  
GGAGGATTAACCTGGGGTATTTTAGCAAATCTTCTATTGATATTGTATTACATGACACT  
TATTATGTA

>Cmarks1-06 [GenBank:KP201857]

GCCATTTTATTATTTTTATCTTTACCTGTTTTAGCTGGAGCTATTACTATACTTTTAACT  
GACCGTAATATTAATACTTCATTTTTTGACCCAGCTGGAGGAGGAGACCCATTTTTTATAC  
CAGCATTATTTTTGATTTTTTGCCATCCAGAAGTTTATATTTTAAATTTTACCAGGATTT  
GGGATAATTTCTCATATTATTAGCCAAGAAAAGTGAAAAAAGGAAACCTTTGGTTCACCT  
GGAATAATTTATGCCATACTAGCAATTGGACTTTTAGGATTTATTGTATGAGCCCACCAT  
ATATTTACTGTAGGAATAGACGTAGACACCCGAGCTTACTTTACTTCTGCTACAATAATT  
ATTGCTGTCCCTACGGGGATTAAAATTTTTAGTTGATTAGCCACTCTTCATGGAACACAA  
ATAACGCTT---AATCCATCTTTATTATGAGCTTTAGGGTTTGTATTCCTTATTCACAGTA  
GGAGGATTAACCTGGGGTATTTTAGCAAATCTTCTATTGATATTGTATTACATGACACT  
TATTATGTA

>Cmarks1-07 [GenBank:KP201858]

GCTATTTTATTATTTTTATCTTTACCTGTTTTAGCTGGAGCTATTACTATACTTTTAACT  
GACCGTAACATTAATACTTCATTTTTTGACCCAGCTGGAGGGGGGACCCATTTTTTATAC  
CAGCATTATTTTTGATTTTTTGACATCCAGAAGTTTATATTTTAAATTTTACCAGGATTT  
GGAATAATTTCTCATATTATTAGCCAAGAAAAGTGAAAAAAGGAAACCTTTGGGTCACCT  
GGAATAATTTATGCTATACTAGCAATTGGACTTTTAGGATTTATTGTATGAGCCCMCCAT  
ATATTTACTGTAGGAATAGACGTAGACACCCGAGCTTACTTTACTTCTGCTACAATAATT  
ATTGCTGTTCCCTACGGGGATTAAAATTTTTAGTTGACTAGCCACTCTTCATGGAACACAA  
ATAACGCTT---AATCCATCTTTATTATGAGCTTTAGGATTTGTATTCCTTATTCACAGTA  
GGAGGATTAACCTGGAGTTATCTTAGCAAATCTTCTATTGATATCGTATTACATGACACT  
TATTATGTA

>Cmarks1-08 [GenBank:KP201859]

GCCATTTTATTATTTTTATCTTTACCTGTTTTAGCTGGAGCTATTACTATACTTTTAACT  
GACCGTAACATTAATACTTCATTTTTTGACCCAGCTGGAGGGGGGACCCATTTTTTATAC  
CAGCATTATTTTTGATTTTTTGACATCCAGAAGTTTATATTTTAAATTTTACCAGGATTT  
GGAATAATTTCTCATATTATTAGCCAAGAAAAGTGAAAAAAGGAAACCTTTGGGTCACCT  
GGAATAATTTATGCTATACTAGCAATTGGACTTTTAGGATTTATTGTATGAGCCCMCCAT  
ATATTTACTGTAGGAATAGACGTAGACACCCGAGCTTACTTTACTTCTGCTACAATAATT  
ATTGCTGTTCCCTACGGGGATTAAAATTTTTAGTTGATTAGCCACTCTTCATGGGACACAA  
ATAACGCTT---AATCCATCTTTATTATGAGCTTTAGGATTTGTATTCCTTATTCACAGTA  
GGAGGATTAACCTGGAGTTATCTTAGCAAATCTTCTATTGATATCGTATTACATGACACT  
TATTATGTA

>Cmarks1-09 [GenBank:KP201860]

GCCATTTTATTATTTTTATCTTTACCTGTTTTAGCTGGAGCTATTACTATACTTTTAACT  
GACCGTAATATTAATACTTCATTTTTTGACCCAGCTGGAGGAGGAGACCCATTTTTTATAC  
CAGCATTATTTTTGATTTTTTGACATCCAGAAGTTTATATTTTAAATTTTACCAGGATTT  
GGAATAATTTCTCATATTATTAGTCAAGAAAAGTGAAAAAAGGAAACCTTTGGGTCACCT  
GGAATAATTTATGCCATACTAGCAATTGGACTTTTAGGATTTATTGTATGAGCCCMCCAT  
ATATTTACTGTAGGAATAGACGTAGACACCCGAGCTTACTTTACTTCTGCTACAATAATT  
ATTGCTGTTCCCTACGGGGATTAAAATTTTTAGTTGATTAGCCACTCTTCATGGAACACAA  
ATAACGCTT---AATCCATCTTTATTATGAGCTTTAGGGTTTGTATTCCTTATTCACAGTA

GGAGGATTAACCTGGAGTTATTTTAGCAAATTCCTTCTATTGATATTGTATTACATGACACT  
TATTATGTA

>Cmarksi-10 [GenBank:KP201861]

GCCATTTTATTATTTTATCTTTACCTGTTTTAGCTGGAGCTATTACTATACTTTTAACT  
GACCGTAACATTAATACTTCATTTTTTTGACCCAGCTGGAGGGGGAGACCCATTTTTTATAC  
CAACATTTATTTTGATTTTTTTGGACATCCAGAAGTTTATATTTTAAATTTTACCAGGATTT  
GGGATAATTTCTCATATTATTAGCCAAGAAAAGTGAAAAAAGGAAACCTTTGGGTCACCT  
GGAATAATTTATGCTATACTAGCAATTGGACTTTTAGGATTTATTGTATGGGCCACCAT  
ATATTTACTGTAGGAATAGACGTGACACCCGAGCTTACTTTACTTCTGCTACAATAATT  
ATTGCTGTTCCCTACGGGAATTAATAATTTTATGTTGATTAGCCACTCTTCATGGAACACAA  
ATAACGCTT---AATCCATCTTTATTATGAGCTTTAGGATTTGTATTCCTTATTCACAGTA  
GGAGGGTAACTGGAGTTATTTTAGCAAATTCCTTCTATTGATATCGTATTACATGACACT  
TATTATGTA

>Cmarksi-11 [GenBank:KP201862]

GCCATTTTATTATTTTATCTTTACCTGTTTTAGCTGGGGCTATTACTATACTTTTAACT  
GATCGTAACATTAATACTTCATTTTTTTGACCCAGCTGGAGGGGGAGACCCATTTTTTATAC  
CAGCATTTATTTTGATTTTTTTGGGCATCCAGAAGTTTATATTTTAAATTTTACCAGGATTT  
GGAATAATTTCTCATATTATTAGCCAAGAAAAGTGAAAAAAGGAAACCTTTGGGTCACCT  
GGAATAATTTATGCTATGCTAGCAATTGGACTTTTAGGATTTATTGTATGAGCCCACCAT  
ATATTTACTGTAGGAATAGACGTAGACACCCGAGCTTACTTTACTTCTGCTACAATAATT  
ATTGCTGTTCCCTACGGGGATTAATAATTTTATGTTGATTGGCCACTCTTCATGGAACACAA  
ATAACGCTT---AATCCATCTTTATTATGAGCTTTAGGATTTGTATTCCTTATTCACAGTA  
GGAGGATTAACCTGGAGTTATTTTAGCAAATTCCTTCTATTGATATCGTATTACATGACACT  
TATTATGTA

>Cmarksi-12 [GenBank:KP201863]

GCCATTTTATTATTTTATCTTTACCTGTTTTAGCCGGAGCTATTACTATACTTTTAACT  
GACCGTAACATTAATACTTCATTTTTTTGACCCAGCTGGAGGGGGAGACCCATTTTTTATAC  
CAGCATTTATTTTGATTTTTTTGGACATCCAGAAGTTTATATTTTAAATTTTACCAGGATTT  
GGGATAATTTCTCATATTATTAGCCAAGAAAAGTGAAAAAAGGAAACCTTTGGGTCACCT  
GGAATAATTTATGCTATACTAGCAATTGGACTTTTAGGATTTATTGTATGAGCCCACCAT  
ATATTTACTGTAGGAATAGACGTAGACACCCGAGCTTACTTTACTTCTGCTACAATAATT  
ATTGCTGTTCCCTACGGGGATTAATAATTTTATGTTGATTAGCCACTCTTCATGGAACACAA  
ATAACGCTT---AATCCATCTTTATTATGAGCTTTAGGATTTGTATTCCTTATTTACAGTA  
GGAGGATTAACCTGGAGTTATTTTAGCAAATTCCTTCTATTGATATCGTATTACATGACACT  
TATTATGTA

>Cmarksi-13 [GenBank:KP201864]

GCCATTTTATTATTTTATCTTTACCTGTTTTAGCTGGAGCTATTACTATACTTTTAACT  
GACCGTAATATTAATACTTCATTTTTTTGACCCAGCTGGAGGAGGAGACCCATTTTTTATAC  
CAGCATTTATTTTGATTTTTTTGGACATCCAGAAGTTTATATTTTAAATTTTACCAGGATTT  
GGAATAATTTCTCATATTATTAGCCAAGAAAAGTGAAAAAAGGAAACCTTTGGGTCACCT  
GGAATAATTTATGCCATACTAGCAATTGGACTTTTAGGATTTATTGTATGAGCCMCCAT  
ATATTTACTGTAGGAATAGACGTAGACACCCGAGCTTACTTTACTTCTGCTACAATAATT  
ATTGCTGTTCCCTACGGGGATTAATAATTTTATGTTGATTAGCCACTCTTCATGGAACACAA  
ATAACGCTT---AATCCATCTTTATTATGAGCTTTAGGATTTGTATTCCTTATTTACAGTA  
GGAGGATTAACCTGGAGTTATTTTAGCAAATTCCTTCTATTGATATCGTATTACATGACACT  
TATTATGTA

>Cmarksi-14 [GenBank:KP201865]

GCTATTTTATTATTTTATCTTTACCTGTTTTAGCTGGAGCTATTACTATACTTTTAACT  
GACCGTAATATTAATACTTCATTTTTTTGACCCAGCTGGAGGAGGAGACCCATTTTTTATAC  
CAGCATTTATTTTGATTTTTTTGGACACCCAGAAGTTTATATTTTAAATTTTACCAGGATTT  
GGAATAATTTCTCATATTATTAGTCAAGAAAAGTGGAAAAAAGGAAACCTTTGGGTCACCT  
GGAATAATTTATGCCATACTAGCAATTGGACTTTTAGGATTTATTGTATGAGCCCACCAT  
ATATTTACTGTAGGAATAGACGTAGACACCCGAGCTTACTTTACTTCTGCTACAATAATT  
ATTGCTGTTCCCTACGGGGATTAATAATTTTATGTTGATTAGCCACTCTTCATGGAACACAA  
ATAACGCTT---AATCCATCTTTATTATGAGCTTTAGGATTTGTATTCCTTATTCACAGTA  
GGAGGATTAACCTGGAGTTATTTTAGCAAATTCCTTCTATTGATATCGTATTACATGACACT  
TATTATGTA

>Cmarksi-15 [GenBank:KP201866]

GCTATTTTATTATTTTATCTTTACCTGTTTTAGCTGGAGCTATTACTATACTTTTAACT  
GACCGTAACATTAATACTTCATTTTTTTGACCCAGCTGGAGGGGGAGACCCATTTTTTATAC  
CAGCATTTATTTTGATTTTTTTGGACATCCAGAAGTTTATATTTTAAATTTTACCAGGATTT  
GGGATAATTTCTCATATTATTAGCCAAGAAAAGTGAAAAAAGGAAACCTTTGGGTCACCT  
GGAATAATTTATGCTATACTAGCAATTGGACTTTTAGGATTTATTGTATGAGCCCACCAT

ATATTTACTGTAGGAATAGACGTAGACACCCGAGCTTACTTTACTTCTGCTACAATAATT  
ATTGCTGTTCCCTACGGGGATTTAAATTTTTAGTTGATTAGCCACTCTTCATGGAACACAA  
ATAACGCTT---AATCCATCTTTATTTATGAGCTTTAGGATTTGTATTTTATTACAGTA  
GGAGGATTAACCTGGAGTTATTTTAGCAAATTCCTTCTATTGATATCGTATTACATGACACT  
TATTATGTA

>Cmarks-16 [GenBank:KP201867]

GCCATTTTATTATTTTATCTTTACCTGTTTTAGCTGGAGCTATTACTATACTTTTAACT  
GACCGTAATATTAATACTTCATTTTTTGACCCAGCTGGAGGAGGAGACCCATTTTTATAC  
CAGCATTTATTTGATTTTTTGGGCATCCAGAAGTTTATATTTTAAATTTTACCAGGATTT  
GGAATAATTTCTCATATTATTAGCCAAGAAAGTGGAAAAAGGAAACTTTTTGGGTCACTT  
GGAATAATTTATGCCATACTAGCAATTGGACTTTTTAGGATTTATTGTATGAGCCCACCAT  
ATATTTACTGTAGGAATAGACGTAGACACCCGAGCTTACTTTACTTCTGCTACAATAATT  
ATTGCTGTTCCCTACGGGGATTTAAATTTTTAGTTGATTAGCCACTCTTCATGGAACACAA  
ATAACGCTT---AATCCATCTTTATTTATGAGCTTTAGGGTTTGTATTTTTTMTTCACAGTA  
GGAGGATTAACCTGGAGTTATTTTAGCAAATTCCTTCTATTGATATTGTATTACATGACACT  
TATTATGTA

>Cpallid-221 [GenBank:KP201868]

GCCATTTTATTATTTATCTTTACCTGTATTAGCCGGGGCAATTACGATACTTTTTAACC  
GACCGTAATATTAATACATCCTTTTTTGACCCAGCTGGCGGAGGAGACCCAATTTTTATAC  
CAACATTTATTTGATTTTTTGGACATCCAGAAGTATATATTTTAAATTCCTCCCGGATTT  
GGAATAATTTCTCATATTATTAGCCAAGAAAGAGTTAAAAAGAAACTTTTTGGATCATTA  
GGAATAATTTATGCAATATGCTATTTGGATTATTAGGATTTATCGTTTTGAGCCCACCAT  
ATATTTACAGTTGGAATAGATGTTGACACTCGAGCTTATTTTTACTTCTGCTACTATAATT  
ATTGCCGTACCTACAGGAATTTAAATTTTTAGATGATTAGCAACTCTTCACGGCACCCAA  
ATAACTTTA---AATCCTTCTCTTTTATGAGCTTTAGGCTTTGTATTTTTTATTACTGTT  
GGAGGACTAACCTGGTGAATTTTAGCCAATTCCTTCTATTGATATTGTCTTCATGATACT  
TATTACGTA

>Chenryi-02 [GenBank:KP201869]

GCCATTTTATTATTTATCTTTACCAGTATTAGCTGGGGCTATTACCATATTATTAACA  
GACCGAAATATTAATACTTCTTTTTTTTGACCCAGCTGGGGGGGGGACCCATTTTTATAC  
CAACATTTATTTGATTTTTTGGCCACCCAGAAGTTTATATTTTAAATTTTACCCGGATTT  
GGTATAATTTCTCACATTATTAGCCAAGAAAGAGGAAAAAGAAACCTTTGGGTCTCTG  
GAAATAATTTATGCTATGCTAGCTATTGGGCTGTTAGGATTTATTGTTTGAGCCCACCAT  
ATATTTACAGTCGGAATGGATGTCGACACACGAGCTTATTTTTACTTCTGCTACAATAATT  
ATTGCTGTACCAACAGGAATTTAAATTTTTAGCTGATTAGCAACTCTTCATGGCACACAA  
ATAACTTTA---AACCCCTCTCTTTTATGAGCCTTAGAATGGGTATTTTTTATTACAGTT  
GGGGGATTAACCGGGGTTATTTTAGCTAATTCATCTNNNNNNNNNNNNNNNNNNNNNNNN  
NNNNNNNNN

>Chenryi-01 [GenBank:KP201870]

GCTATTTTATTATTTATCTTTACCAGTATTAGCTGGGGCTATTACCATATTATTAACA  
GACCGAAATATTAATACTTCTTTTTTTTGACCCAGCTGGGGGAGGAGACCCATTTTTATAC  
CAACATTTATTTGATTTTTTGGCCACCCAGAAGTTTATATTTTAAATTTTACCTGGATTT  
GGTATAATTTCTCACATTATTAGCCAAGAAAGAGGAAAAAGAAACCTTTGGGTCTCTG  
GGAATAATTTATGCTATACTAGCTATTGGGTTGTTAGGATTTATTGTTTGAGCCCACCAT  
ATATTTACAGTCGGAATGGATGTCGACACACGAGCTTATTTTTACTTCTGCTACAATAATT  
ATTGCTGTACCAACAGGAATTTAAATTTTTAGCTGATTAGCGACTCTTCATGGCACACAA  
ATAACTTTA---AACCCCTCTCTTTTATGAGCCTTAGGATTTGTATTTTTTATTACAGTT  
GGGGGATTAACCGGGGTTATTTTAGCTAATTCATCTATTGATATTGTCTCCATGACACA  
TATTATGTA

>Cbundy-01 [GenBank:KP201871]

NNNNNNNNNNNNNNNNNNNNNNNNNNNNNNNNNNNNNNNNNNNNNNNNNNNNNNNNNTTRACK  
GATCGAAATATTAATACTTCTTTTTTTTGACCCAGCTGGGGGAGGAGATTCAATCCTATAC  
CAACATCTATTCTGATTTTTTTGGACACCCGAAAGTTTATATTTTAAATTTTGGCCGGATTT  
GGTATAGTTTTCACATATTATTAGCCAAGAAAGAGGAAAAAGAAACCTTTTGGATCTTTA  
GGGATAATTTATGCTATACTTGGCTATTGGTTTATTAGGATTCATTGTTTGAGCCCACCAT  
ATATTTACAGTAGGGATAGATGTTGACACTCGAGCTTATTTTTACTTCTGCTACAATAATT  
ATTGCTGTCCCAACAGGAATTTAAATTTTTAGTTGATTGGCCACTCTTCATGGAACCCAA  
ATAACCTT---AATGCCCTCTTTTATGAGCCTTAGGATTTGTATTTTTTATTACTGTA  
GGGAGACTGACAGGAGTAATTTTGCTAATTCATCTATTTRATATTGGTTTACATGATACA  
TATTATGTA

>Cbunroo-01 [GenBank:KP201872]

GCCATTTTATTAYTATTATCTTTACCAGTCTTAGCCGGAGCTATCACTATATTATTAACA  
GACCGTAATATTAATACTTCATTTTTTTTGACCCGCGGAGGAGGCGACCCAATTCCTTTAT

CAACATTTATTTGATTTTTTGGGCACCCAGAAGTTTATATTTTAATTTTACCTGGATTT  
GGAATAATTTCTCATATTATTAGCCAAGAAAGAGGTAAAAAGAACTTTTGGATCTTTA  
GGAATAATCTATGCAATACTAGCAATTGGACTTTTAGGATTTATTGTATGAGCTCATCAT  
ATATTTACTGTAGGAATAGATGTAGATACTCGTGCTTACTTTACTTCAGCTACTATAATT  
ATTGCTGTGCCAACAGGAATTTAAATTTTGTAGCTGATTAGCAACATTACATGGGACACAA  
ATAACATTA---AATCCCTCTCTTCTTTGATCTCTAGGATTTGTATTCCTATTTACAGTA  
GGGGACTCACAGGAGTAATCTTAGCTAATCTTCCATTGATATTGTTCTTCATGATACC  
TACTATGTA

>C.actoni JAP [GenBank:AB360971]

GCATTATTATTACTCTCTTTACCTGTATTAGCAGGAGCTATTACTATGCTTCTTACC  
GATCGTAATTTTAATACTTTCATTTTTTTGACCCGCGGAGGAGACCCGTTCTTTTAT  
CAACATTTATTTGATTTTTTTGGTCATCCAGAGGTTTATATTTTAATTTTACCTGCTTTT  
GGGATTATTTACACATTATGGCTGGAGAAAAGTGGGAAAAAGGAACCATTTGGAGTTTTA  
GCCATAACAATACGCAATTAGAGCTATTGGGTTATTAGGATTTTTTGTGTGAGCACATCAT  
ATGTTTACAGTTGGGTTAGATGTAGATACTCGAGCTACTTCTCTGCAGCTACAATAGTA  
ATTGGAATTTCCACAGGAATTTAAATTTTGTAGTTGATTAGCTACTATTTATGGAAGTCCA  
TGACAATTT---ACTCCAGCTATATTATGAGCTTTAGGATTTATTTTTTTTATTTACTTTA  
GGGGGATTAACCTGGAATTTGTTTTATCAAATACTGCTATTGATATTGTATTACATGATACT  
TATTATGTT

>C.arakawae JAP 1 [GenBank:AB360972]

GCTATTCTTTTACTTCTTTTACCTGTATTAGCTGGAGCTATTACTATATTATTAACC  
GATCGAAATATTAATACTTCTTTTTTTGACCCCGCCGGTGGGGGAGACCCAATTTTATAC  
CAACATTTATTTGATTTTTTTGGCCACCCCGAAGTTTATATTTTAATTTTACCAGGATTC  
GGAATAATCTCTCATATTATCAGCCAAGAAAGAGGGAAAAAGAACTTTTGGAGCTTTA  
GGAATAATTTACGCTATACTTGCTATTGGATTATTAGGATTCATTGTTTGGAGCTCACCAC  
ATATTTACAGTAGGAATAGACGTTGATACTCGAGCATATTTTACTTCCGCTACTATAATT  
ATTGCGGTTCCCTACTGGAATTTAAATTTTGTAGATGATTGGCCACCCCTCATGGAACACAA  
ATAACTTTA---ACCCCTTCTCTATTATGATCCTTAGGATTTGTATTTTTTATTTACTGTA  
GGAGGATTAACAGGAGTTATCTTAGCAAACCTCTATTGATATTATCCTTCATGACACT  
TATTATGTC

>C.arakawae JAP 2 [GenBank:AB360973]

GCTATTCTTTTACTTCTTTTACCTGTATTAGCTGGAGCTATTACTATATTATTAACC  
GATCGAAATATTAATACTTCTTTTTTTGACCCCGCCGGTGGGGGAGACCCAATTTTATAC  
CAACATTTATTTGATTTTTTTGGCCACCCCGAAGTTTATATTTTAATTTTACCAGGATTC  
GGAATAATCTCTCATATTATCAGTCAAGAAAGAGGGAAAAAGAACTTTTGGAGCTTTA  
GGAATAATTTACGCTATACTTGCTATTGGATTATTAGGATTCATTGTTTGGAGCTCACCAC  
ATATTTACAGTAGGAATAGACGTTGATACTCGAGCATATTTTACTTCCGCTACTATAATT  
ATTGCGGTTCCCTACTGGAATTTAAATTTTGTAGATGATTGGCCACCCCTCATGGAACACAA  
ATAACTTTA---ACCCCTTCTCTATTATGATCCTTAGGATTTGTATTTTTTATTTACTGTA  
GGAGGATTAACAGGAGTTATCTTAGCAAACCTCTATTGATATTATCCTTCATGACACT  
TATTATGTC

>C.arakawae JAP3 [GenBank:AB360974]

GCTATTCTTTTACTTCTTTTACCTGTATTAGCTGGAGCTATTACTATATTATTAACC  
GATCGAAATATTAATACTTCTTTTTTTGACCCCGCTGGGGGGGAGACCCAATTTTATAC  
CAACATTTATTTGATTTTTTTGGCCACCCCGAAGTTTATATTTTAATTTTACCAGGATTC  
GGAATAATCTCTCATATTATCAGTCAAGAAAGAGGGAAAAAGAACTTTTGGAGCTTTA  
GGAATAATTTACGCTATACTTGCTATTGGATTATTAGGATTCATTGTTTGGAGCTCACCAC  
ATATTTACAGTAGGAATAGACGTTGATACTCGAGCATATTTTACTTCCGCTACTATAATT  
ATTGCGGTTCCCTACTGGAATTTAAATTTTGTAGATGATTGGCCACCCCTCATGGAACACAA  
ATAACTTTA---ACCCCTTCTCTATTATGATCCTTAGGATTTGTATTTTTTATTTACTGTA  
GGAGGATTAACAGGAGTTATCTTAGCAAACCTCTATTGATATTATCCTTCATGACACT  
TATTATGTC

>C.arakawae JAP4 [GenBank:AB360975]

GCTATTCTTTTACTTCTTTTACCTGTATTAGCTGGAGCTATTACTATATTATTAACC  
GATCGAAATATTAATACTTCTTTTTTTGACCCCGCCGGTGGGGGAGACCCAATTTTATAC  
CAACATTTATTTGATTTTTTTGGCCACCCCGAAGTTTATATTTTAATTTTACCAGGATTC  
GGAATAATCTCTCATATTATCAGTCAAGAAAGAGGGAAAAAGAACTTTTGGAGCTTTA  
GGAATAATTTACGCTATACTTGCTATTGGATTATTAGGATTCATTGTTTGGAGCTCACCAC  
ATATTTACAGTAGGAATAGACGTTGATACTCGAGCATATTTTACTTCCGCTACTATAATT  
ATTGCGGTTCCCTACTGGAATTTAAATTTTGTAGATGATTGGCCACCCCTCATGGAACACAA  
ATAACTTTA---ACCCCTTCTCTATTATGATCCTTAGGATTTGTATTTTTTATTTACTGTA  
GGAGGATTAACAGGAGTTATCTTAGCAAACCTCTATTGATATTATCCTTCATGACACT  
TATTATGTC

>C.arakawae JAP5 [GenBank:AB361004-Yng05\_2  
GCTATTCTTTTACTTCTTTCTTTACCTGTATTAGCTGGAGCTATTACTATATTATTAACC  
GATCGAAATATTAATACTTCTTTTTTTGACCCCGCCGGTGGGGGAGACCCAATTTTATAC  
CAACATTTATTTTGATTTTTTTGGCCACCCCGAAAGTTTATATTTTAAATTTTACCAGGATTC  
GGAATAATCTCTCATATTATCAGTCAAGAAAAGAGGGAAAAAAGAACTTTTTGGAGCTTTA  
GGAATAATTTACGCTATACTTGCTATTGGATTATTAGGATTCATTGTTTGAGCTCACCAC  
ATATTTACAGTAGGAATAGACGTTGATACTCGAGCATATTTTACTTCCGCTACTATAATT  
ATTGCGGTTCTACTGGAATTTAAATTTTTAGATGATTGGCCACCCCTCATGGAACACAA  
ATAACTTTA---ACCCCTTCTCTATTATGATCCTTAGGATTTGTATTTTTTATTTACTGTA  
GGAGGATTAACAGGAGTTATCTTAGCAAACCTCTATTGATATTATCCTTCATGACACT  
TATTATGTC

>C.verbosus [GenBank:AB646615]  
GCCATTCTCCTTCTCCTATCTCTACCTGTATTAGCCGGAGCTATTACTATATTATTAAC  
GATCGAAATATTAATACTTCAATTTTTTTGACCCAGCTGGCGGGGAGACCCCATCTTATAC  
CAACATTTATTTTGATTTCTTTGGACACCCAGAAGTTTATATTTTAAATTTTACCAGGATTC  
GGGATAATCTCCCATATTATTAGTCAAGAAAAGCGGTAAAAAAGAAACCTTTGGTTCTTTA  
GGAATAATTTACGCTATACTAGCTATTGGATTATTAGGATTTATTGTTTGAGCCCATCAT  
ATATTTACTGTAGGAATAGATGTAGATACCCGGGCTTACTTTACTTCAGCTACCATAATT  
ATTGCGGTTCCAACAGGAATTTAAATTTTTAGTTGACTGGCCACTCTTCATGGAACCAA  
ATAACCTT---AACCCATCCCTTTTATGATCCTTAGGATTTGTATTTTTTATTTACTGTA  
GGAGGACTTACTGGAGTAATCCTGGCTAATTCATCTATTGACATTGTTCTTCATGATACT  
TATTACGTA

>C.brevitarsis Cbrev-AB1 [GenBank:AB360994]  
GCTATTTTATTATTATTATCTTTACCAGTATTGGCTGGAGCAATTACTATATTATTGACT  
GATCGAAATATTAATACTTCTTTTTTTGATCCTGCAGGAGGAGGGGATCCAATTTTATAT  
CAACATTTGTTTTGATTTTTTTGGGCATCCAGAAGTTTATATTTTAAATTTTACCCTGGGTTT  
GGGATTGTTTCTCATATTATTGTCAAGAAAAGAGTTAAAAAAGAAGCTTTTTGGTGTATTG  
GGAATAATGTATGCTATTGCTGCAATTGGTTTATTAGGATTTATTGTATGAGCTCATCAT  
ATATTTACTGTTGGACTAGACGTAGATACTCGAGCTTATTTTACTTCTGCTACTATAATT  
ATTGCTGTACCAACAGGAATTTAAATTTTTAGTTGAATGGCTACTATATATGGAACCAA  
TTAAATTTA---ACTCCTGCTTTATTATGATCCTTAGGGTTTGTATTTTTTATTTACTGTA  
GGAGGATTAACGGGGGTTGTTTTAGCTAATTCCTCAATTGATATTATTTTACATGATACA  
TATTATGTA

>C.brevitarsis Cbrev-AB2 [GenBank:AB360995]  
GCTATTTTATTATTATTATCTTTACCAGTATTGGCTGGAGCAATTACTATATTATTGACT  
GATCGAAATATTAATACTTCTTTTTTTGATCCTGCAGGAGGAGGGGATCCAATTTTATAT  
CAACATTTGTTTTGATTTTTTTGGGCATCCAGAAGTTTATATTTTAAATTTTACCCTGGGTTT  
GGGATTGTTTCTCATATTATTGTCAAGAAAAGAGTTAAAAAAGAAGCTTTTTGGTGTATTG  
GGAATAATGTATGCTATTGCTGCAATTGGTTTATTAGGATTTATTGTATGAGCTCATCAT  
ATATTTACTGTTGGACTAGACGTAGATACTCGAGCTTATTTTACTTCTGCTACTATAATT  
ATTGCTGTACCAACAGGAATTTAAATTTTTAGTTGAATGGCTACTATATATGGAACCAA  
TTAAATTTA---ACTCCTGCTTTATTATGATCCTTAGGGTTTGTATTTTTTATTTACTGTA  
GGAGGATTAACGGGGGTTGTTTTAGCTAATTCCTCAATTGATATTATTTTACATGATACA  
TATTATGTA

>C.brevipalpis JAP [GenBank:AB360998]  
GCTATTTTACTTTTATTATCTTTACCAGTTTTAGCTGGAGCAATTACAATATTATTAACA  
GATCGAAATCTTAATACTTCTTTTTTTGACCCCGGCAGGAGGTGGTGATCCTATTCTTTAC  
CAGCATTTATTTTGATTTTTTTGGTCACCCAGAAGTTTATATTTTAAATTTTACCAGGATTT  
GGTATTGTTTCTCATGTTATTATAATGAAAAGAAAAAAGAAGCTTTTTGGATCTTTA  
GGAATAATATATGCTATATCTACTATTGGATTATTAGGATTTATTGTCGAGCACATCAT  
ATATTTACAGTAGGAATAGATATTGATACTCGAGCTTATTTTACTTCAGCAACAATAATT  
ATTGCGGTACCTACAGGAATTAAGGTATTTAGTTGATTGCTTCATTATCGGGATCAAAA  
TTTTAATCAT---ACACCTGCTTTATTATGAAGTATTGGATTTTTTATTTTTTACTGTA  
GGAGGTTTAAACAGGAGTAATTTTAGCTAACTCTTCTATTGACTTAGTATTACATGACACA  
TATTATGTT

>C.cylindratus JAP1 [GenBank:AB361006]  
GCTATTTTACTACTTCTCTCCCTTCCAGTTTTAGCAGGAGCTATTACAATACTTTTAAACA  
GATCGAAATCAATACTTCAATTTTTTTGACCCAGCAGGAGGAGGTGACCCATTCTTTTAT  
CAACACTTATTTTGATTTTTTTGGACACCCAGAAGTTTACATTTTAAATTTTACCAGGATTT  
GGAATTGTGTCCCATATTATTACTCAAGAAAAGAGGAAAAAATGAACTTTTTGGCCCCCTA  
GGAATAATTTATGCCATAACAGCTATTGGGCTCCTAGGTTTTATCGTCTGAGCTCATCAT  
ATATTCACAGTAGGAATAGATGTAGATACCCGAGCTTATTTTACTTCAGCTACAATAGTT  
ATTGCAATTTCAACCGGAATCAAAATTTTTAGCTGAATCGCAACATTACAAGGAACCCAA

ATAATTTTT---TCAACATCCCTTCTATGATCCCTCGGATTTATTTTCCATTTTACAGTA  
GGAGGATTAACGGAGTTGTTTTAGCTAACTCTTCAATTGATATTATCTTACATGATACC  
TATTATGTA  
>C.cylindratus JAP2 [GenBank:AB361007]  
GCTATTTTACTACTTCTCTCCCTTCCAGTTTGTAGCAGGAGCTATTACAATACTTTTAAACA  
GATCGAAACATCAATACTTCATTTTTTGGACCCAGCAGGAGGAGGTGACCCATTTCTTTAT  
CAACACTTATTTTGATTTTTTCGGGCACCCAGAAGTTTACATTTTAAATTTTACCAGGATTT  
GGAATTGTGTCCCATATTATTACTCAAGAAAGAGGAAAAAATGAAACTTTTGGCCCCCTA  
GGAATAATTTATGCCATAACAGCTATTGGGCTCCTAGGTTTTATCGTCTGAGCTCATCAT  
ATATTCACAGTAGGAATAGATGTAGATACCCGAGCTTATTTTACCTCAGCTACAATAGTT  
ATTGCAATTCCAACCGGAATCAAAAATTTTTAGCTGAATCGCAACATTACAAGGAACCCAA  
ATAATTTTT---TCAACATCCCTTCTATGATCCCTCGGATTTATTTTCCATTTTACAGTA  
GGAGGATTAACGGAGTTGTTTTAGCTAACTCTTCAATTGATATTATCTTACATGATACC  
TATTATGTA  
>C.dubius JAP [GenBank:AB361000]  
GCTATTTTATTACTTTTATCATTACCTGTATTAGCCGGAGCTATTACAATATTATTAACA  
GATCGAAATATTAATACTTCTTTTTTTGACCCGAGGAGGAGGAGACCCATTTTTTATAT  
CAACATTTATTTTGATTTTTTGGACACCCAGAAGTTTACATTTTAAATTTTACCCTGGATTT  
GGTATAATTTCTCATATTATTAGTCAAGAAAGAGGAAAAAAGGAAACCTTTGGTGTCTTA  
GGTATAATTTATGCCATATTAGCTATTGGTTTATTAGGATTTATTGTTTGGAGCACATCAT  
ATATTACTGTAGGTATAGATGTGATACACGAGCATATTTTACTTCAGCTACTATAAAT  
ATTGCTGTTTCCACAGGAATTAATAATTTTTAGTTGATTAGCAACTTTACATGGAAC TCAA  
ATAACCTTA---AACCCATCTCTTTTTATGATCATTAGGGTTGTATTCTTTACTGTGA  
GGAGGATTAACAGGAGTAATTTTAGCTAATTCATCTATTGATATTGTTCTTCATGATACC  
TATTATGTT  
>C.humeralis JAP1 [GenBank:AB360992]  
GCTATCTTACTTCTTCTCTCCCTACCTGTCTTAGCCGGAGCAATTACTATATTACTAACC  
GACCGAAACATTAATACATCATCTCTTTGACCCAGCAGGAGGAGGGACCCAATTTCTATAC  
CAACATTTATTTTGATTTTTTGGCCACCCAGAAGTTTATATCCTCATTCTTCTGGCTTT  
GGAATAATCTCCCATATTATTAGCCATGAATGCGGGAAAAAAGAAACATTTGGAGCATTA  
GGTATAATTTATGCTATATTCTCCATTTGGACTATTAGGATTTATCGTTTGGAGCCACCAT  
ATATTTACCGTAGGAATAGACATCGATACGCGAGCTTACTTTACTGCCGCCACTATAAAT  
ATCGCAGTACCCACAGGAATTAATAATCTTTAGCTGACTAGCCACCCCTCACGGAGCTCAA  
TTAAACTTT---TCCCCCTCAATCCTATGATCATTAGGATTTGTGTTTCTATTCACTGTA  
GGAGGATTAACAGGAGTATTTTAGCTAACTCCTCCATTTGATATTATTCTTCATGACACT  
TATTATGTT  
>C.humeralis JAP2 [GenBank:AB360993]  
GCTATCTTACTTCTTCTCTCCCTACCTGTCTTAGCCGGAGCAATTACTATATTACTAACC  
GACCGAAACATTAATACATCATCTCTTTGACCCAGCAGGAGGAGGGACCCAATTTCTATAC  
CAACATTTATTTTGATTTTTTGGCCACCCAGAAGTTTATATCCTCATTCTTCTGGCTTT  
GGAATAATCTCCCATATTATTAGCCATGAATGCGGGAAAAAAGAAACATTTGGAGCATTA  
GGTATAATTTATGCTATATTCTCCATTTGGACTATTAGGATTTATCGTTTGGAGCCACCAT  
ATATTTACCGTAGGAATAGACATCGATACGCGAGCTTACTTTACTGCCGCCACTATAAAT  
ATCGCAGTACCCACAGGAATTAATAATCTTTAGCTGACTAGCCACCCCTCACGGAGCTCAA  
TTAAACTTT---TCCCCCTCAATCCTATGATCATTAGGATTTGTGTTTCTATTCACTGTA  
GGAGGATTAACAGGAGTATTTTAGCTAACTCCTCCATTTGATATTATTCTTCATGACACT  
TATTATGTT  
>C.humeralis JAP3 [GenBank:AB364651]  
GCTATCTTACTTCTTCTCTCCCTACCTGTCTTAGCCGGAGCAATTACTATATTACTAACC  
GACCGAAACATTAATACATCATCTCTTTGACCCAGCAGGAGGAGGGACCCAATTTCTATAC  
CAACATTTATTTTGATTTTTTGGCCACCCAGAAGTTTATATCCTCATTCTTCTGGCTTT  
GGAATAATCTCCCATATTATTAGCCATGAATGCGGGAAAAAAGAAACATTTGGAGCATTA  
GGTATAATTTATGCTATATTCTCCATTTGGACTATTAGGATTTATCGTTTGGAGCCACCAT  
ATATTTACCGTAGGAATAGACATCGATACGCGAGCTTACTTTACTGCCGCCACTATAAAT  
ATCGCAGTACCCACAGGAATTAATAATCTTTAGCTGACTAGCCACCCCTCACGGAGCTCAA  
TTAAACTTT---TCCCCCTCAATCCTATGATCATTAGGATTTGTGTTTCTATTCACTGTA  
GGAGGATTAACAGGAGTATTTTAGCTAACTCCTCCATTTGATATTATTCTTCATGACACT  
TATTATGTT  
>C.jacobsoni JAP2 [GenBank:AB360991]  
GCTGTATTATTATTATTATCATTACCAGTATTAGCTGGAGCTATTACAATATTATTAATA  
GACCGTAATATTAATACTTCATTTTTTGGATCCAAGAGGAGGTGGAGATCCAATTTTATAT  
CAACATCTTTTTTGATTTTTTGGTCATCCTGAAGTTTATATTTTAAATTTTACCAGGATTT  
GGAATTATTTCTCATATCGTATTACATGAAAGAGGAAAAAATGCTTTTTGGAGCATTA



GGAATAATTTATGCTATAATTACTATTGGAATTTTAGGTTTTATTGTATGAGCTCATCAT  
ATATTTACAGTTGGAATAGATGTAGATACTCGAGCATATTTTACATCAGCTACTATAATT  
ATTGCTATTCCCTACAGGAATTTAAATTTTATGATGAATTGCTACCTTTCAAGGTAGAAAT  
TTAAATCTT---TCTACTTCTTTACTTTGAACTTTAGGATTTTTATTTTTATTTACAATA  
GGTGGACTGACAGGAGTAATTTTAGCTAATTTCTTCTCTTGATATTGTATTACATGATACT  
TATTATGTA

>C.jacobsoni JAP1 [GenBank:AB360990]

GCTGTATTATTATTATTATCATTACCAGTATTAGCTGGAGCTATTACAATATTATTAATA  
GACCGTAATATTAATACTTCATTTTTTATGATCCAAGAGGAGGTGGAGATCCAATTTTTATAT  
CAACATCTTTTTTGGATTTTTTGGTCATCCTGAAGTTTATATTTTAATTTTACCAGGATTT  
GGAATTATTTCTCATATCGTATTACATGAAAGAGGAAAAAAATGCTTTTTGGAGCATT  
GGAATAATTTATGCTATAATTACTATTGGAATTTTAGGTTTTATTGTATGAGCTCATCAT  
ATATTTACAGTTGGAATAGATGTAGATACTCGAGCATATTTTACATCAGCTACTATAATT  
ATTGCTATTCCCTACAGGAATTTAAATTTTATGATGAATTGCTACCTTTCAAGGTAGAAAT  
TTAAATCTT---TCTACTTCTTTACTTTGAACTTTAGGATTTTTATTTTTATTTACAGTA  
GGTGGACTGACAGGAGTAATTTAGCTAATTTCTTCTCTTGATATTGTATTACATGATACT  
TATTATGTA

>C.japonicus JAP1 [GenBank:AB361001]

GCAATTTTGTACTTTTATCTTTACCAGTTTTAGCAGGAGCCATTACTATACTTTTAACA  
GATCGTAATATTAATACTTCTTTTTTGGACCTGCAGGAGGGGGAGACCCATTTTTATAC  
CAGCATTATTTGATTTTTTGGACACCCAGAAGTTTATATTTTAATTTCTCCCTGGATTC  
GGGATAATTTCTCATATTATTAGTCAAGAAAGAGGGAAAAAAGAAACATTTGGAGCGCTA  
GGAATAATTTACGCTATACTAGCTATTGGACTTTTAGGATTTATTGTTTGGAGCTCATCAT  
ATATTCACAGTAGGAATAGACGTCGATACACGAGCTTATTTACATCAGCTACTATAATT  
ATTGCTGTTCCGACAGGAATTTAAATTTTATGCTGATTAGCTACCC TTCACGGAACACAA  
ATAACTTTA---AATCCTTCTTTACTTTGGTCATTAGGATTTGTATTTTTATTTACAGTA  
GGAGGTCTAACAGGAGTAATTTAGCTAACTCTTCCATTGATATTGTTCTTCATGATACT  
TATTATGTA

>C.japonicus JAP2 [GenBank:AB361002]

GCAATTTTGTACTTTTATCTTTACCAGTTTTAGCAGGAGCCATTACTATACTTTTAACA  
GATCGTAATATTAATACTTCTTTTTTGGACCTGCAGGAGGGGGAGACCCATTTTTATAC  
CAGCATTATTTGATTTTTTGGACACCCAGAAGTTTATATTTTAATTTCTCCCTGGATTC  
GGGATAATTTCTCATATTATTAGTCAAGAAAGAGGGAAAAAAGAAACATTTGGAGCGCTA  
GGAATAATTTACGCTATACTAGCTATTGGACTTTTAGGATTTATTGTTTGGAGCTCATCAT  
ATATTCACAGTAGGAATAGACGTCGATACACGAGCTTATTTACATCAGCTACTATAATT  
ATTGCTGTTCCGACAGGAATTTAAATTTTATGCTGATTAGCTACCC TTCACGGAACACAA  
ATAACTTTA---AATCCTTCTTTACTTTGGTCATTAGGATTTGTATTTTTATTTACAGTA  
GGAGGTCTAACAGGAGTAATTTAGCTAACTCTTCCATTGATATTGTTCTTCATGATACT  
TATTATGTA

>C.kibunensis JAP1 [GenBank:AB646610]

GCTATTCTTCTTTTTATTATCTTTGCCAGTATTAGCAGGGGCTATTACAATACTTTTAACT  
GATCGAAATATTAACACTTCATTTTTTGGACCTGCAGGAGGAGGCGACCCATTTTTGTAC  
CAACACCTATTTTGGATTTCTTTGGTCACCCAGAAGTTTATATTTTAATTTTACCAGGATTC  
GGAATAATTTCTCATATTATTAGCCAAGAAAGCGGGAAAAAAGGAAACCTTTGGGTCTTTA  
GGAATGATTTATGCTATACTAGCTATTGGCTTATTAGGATTTATTGTATGAGCCATCAC  
ATATTCAGTGTAGGGATAGACGTAGACACCCGAGCTTATTTTACATCGGCAACTATAAAT  
ATTGCCGTCCCAACTGGCATTTAAATTTTTAGTTGACTAGCAACTCTCCATGGAACCCAA  
ATAACGCTT---AACCTTCACTTTTTATGATCCTTAGGATTTGTATTTTTATTTACTGTT  
GGGGGATTAACAGGGGTAATCTTAGCTAATTTCTTCTATTGATATTGTCTTCATGACACT  
TATTATGTA

>C.kibunensis JAP2 [GenBank:AB646611]

GCTATTCTTCTTTTTATTATCTTTGCCAGTATTAGCAGGGGCTATTACAATACTTTTAACT  
GATCGAAATATTAACACTTCATTTTTTGGACCTGCAGGAGGAGGCGACCCATTTTTGTAC  
CAACACCTATTTTGGATTTCTTTGGTCACCCAGAAGTTTATATTTTAATTTTACCAGGATTC  
GGAATAATTTCTCATATTATTAGCCAAGAAAGCGGGAAAAAAGGAAACCTTTGGGTCTTTA  
GGAATGATTTATGCTATACTAGCTATTGGCTTATTAGGATTTATTGTATGAGCCATCAC  
ATATTCAGTGTAGGGATAGACGTAGACACCCGAGCTTATTTTACATCGGCAACTATAAAT  
ATTGCCGTCCCAACTGGCATTTAAATTTTTAGTTGACTAGCAACTCTCCATGGAACCCAA  
ATAACGCTT---AACCTTCACTTTTTATGATCCTTAGGATTTGTATTTTTATTTACTGTT  
GGGGGATTAACAGGAGTAATCTTAGCTAATTTCTTCTATTGATATTGTCTTCATGACACT  
TATTATGTA

>C.maculatus JAP1 [GenBank:AB360986]

GCAATTTTATTACTTTTATCCCTGCCGTTTTAGCAGGGGCTATCACAATACTTTTAACA

GATCGAAATATTAATACTTCTTTTTTTGACCCCGCGGGAGGAGGGGACCCATTTTTTATAC  
CAACATCTATTTTGATTCTTCGGACACCCCTGAAGTTTATATTTTAATTTTACCTGCATTC  
GGCATTATTTTACATATTATCGCCCATGAGAGAGGGAAAAAGGAAGCATTCGGAGCTTTA  
GCTATAATATATGCAATTACAACAATTGGACTTTTAGGATTTATTGTATGAGCTCATCAT  
ATATTTACAGTAGGGTTAGACGTAGACACTCGAGCTTACTTTTCCCTCTGCGACTATAGTA  
ATTGCCGTTCCAACCGGAATTAATAATTTTGTAGTTGAATGGCCACTCTTTACGGAGCCCAT  
TGAAAATAC---ACCCCTTCATTGCTATGAGCGTTAGGATTTATTTTTTTTATTTACCTTA  
GGAGGATTAACAGGAATTATTTTAGCTAATTCGTCAATTGATATTGTTCTCCATGACACA  
TACTATGTA

>C.maculatus JAP2 [GenBank:AB360987]

GCAATTTTATTACTTTTATCCCTGCCCGTTTGTAGCAGGGGCTATCACAATACTTTTAAACA  
GATCGAAATATTAATACTTCTTTTTTTGACCCCGCGGGAGGAGGGGACCCATTTTTTATAC  
CAACATCTATTTTGATTCTTCGGACACCCCTGAAGTTTATATTTTAATTTTACCTGCATTC  
GGCATTATTTTACATATTATCGCCCATGAGAGAGGGAAAAAGGAAGCATTCGGAGCTTTA  
GCTATAATATATGCAATTACAACAATTGGACTTTTAGGATTTATTGTATGAGCTCATCAT  
ATATTTACAGTAGGGTTAGACGTAGACACTCGAGCTTACTTTTCCCTCTGCGACTATAGTA  
ATTGCCGTTCCAACCGGGATTAAAAATTTTGTAGTTGAATGGCCACTCTTTACGGAGCCCAT  
TGAAAATAC---ACCCCTTCATTATTATGAGCGTTAGGATTTATTTTTTTTATTTACCTTA  
GGAGGGTTAACAGGAATTATTTTAGCTAATTCATCAATTGATATTGTTCTTCATGACACA  
TACTATGTA

>C.matsuzawai JAP1 [GenBank:AB364649]

GCTATTTTACTTTTATTATCACTTCCAGTGTAGCCGGAGCTATTACTATACTGCTTACT  
GATCGAAATATTAATACATCATTTTTTTGACCCCTGCAGGAGGAGGAGACCCATTTCTATAC  
CAGCATTATTTTGGATTGTTTGGCCATCCAGAGGTATACATTTTAAATTTTGGCAGGATTT  
GGGATAATTTCCCATATTATCAGCCAAGAAAAGAGGGAAAAAAGAACTTTTGGGGCTTTA  
GGAATAATTTATGCTATACTTGCAATTGGATTATTAGGTTTTATCGTATGAGCCCACCAT  
ATATTTACTGTAGGCATAGATATTGACACTCGAGCTTACTTTTACATCTGCTACTATAATT  
ATTGCAGTTCCCACAGGAATTAATAATTTTGTAGCTGACTAGCTACTCTTCATGGAACCTCAA  
ATAATTTTTT---ACCCCTCAAATTTTATGATCCCTAGGCTTTGTATTTTTTATTTACATTA  
GGGGGATTAACAGGAGTAATTTTAGCAAATTCCTCTATTGATATTATTTCTTCACGATACC  
TACTATGTA

>C.matsuzawai JAP2 [GenBank:AB364650]

GCTATTTTACTTTTATTATCACTTCCAGTATTAGCAGGAGCTATTACTATACTTCTTACT  
GACCGAAATATTAATACATCATTTTTTTGACCCCTGCAGGAGGGGCGACCCATTTTTTATAC  
CAACATCTATTTTGATTCTTTGGCCATCCAGAAGTATATATTTTAAATTTTACCAGGATTT  
GGTATAATTTCCCATATTATTAGACAAGAAAAGAGGGAAAAAAGAACTTTTGGGGCTTTA  
GGAATAATCTATGCTATACTTGCAATTGGATTACTAGGTTTTATCGTATGAGCTCACCAT  
ATATTTACTGTAGGAATAGATATTGACACTCGAGCTTACTTTTACATCTGCTACTATAATT  
ATTGCAGTTCCCTACAGGAATTAATAATTTTGTAGCTGACTAGCTACTCTTCATGGAACCTCAA  
ATAATTTTTT---ACCCCAAAATTTTATGATCCCTCGTTTTGTATTTTTTATTTACATTA  
GGAGGATTAACAGGAGTAATTTTAGCAAATTCCTCTATTGATATCATTTCTACACGATACC  
TATTATGTA

>C.nipponensis JAP [GenBank:AB360999]

GCTATTTTATTACTTTTATCTTTACCTGTATTAGCAGGAGCTATTACTATACTTTTAAACA  
GATCGAAATTTTAACTTTCATTTTTTTGACCCCGCAGGAGGAGGAGACCCAATTTCTATAC  
CAACATTTATTTGATTCTTTGGCCATCCAGAAGTTTATATTTTAAATTTTACCAGGATTT  
GGTATTATTTCTCATATTATTTCTCATGAAAGAGGAAAAAAGAAAGTTTTTGGAACTTA  
GGAATAATTTATGCTATAAACAATAATTGGATTATTAGGTTTCATCGTATGAGCACACCAC  
ATATTTACAGTAGGAATAGACGTAGATACCCGAGCTTATTTTACTTCAGCAACAATAATT  
ATTGCTGTGCCTACAGGTATTAATAATTTTGTAGTTGATTAGCAACTATTTATGGCTCTCAA  
ATTATATTTAAAAATCCAGCTATTTTATGAGCTATTGGATTTCGTATTTTTTATTTACAATA  
GGGGGATTAACAGGAGTAATTTTAGCTAATTCCTCCATTGATGTTATTCTTCATGATACA  
TATTATGTA

>C.ohmorii JAP1 [GenBank:AB360976]

GCAATCCTTCTACTATTATCCCTTCCAGTCTTAGCCGGAGCCATCACGATATTACTAACA  
GATCGAAATATTAATACTTCAATTTTTTGTATCTTCAGGAGGAGGAGACCCATTTCTTTTAC  
CAACATTTATTTGATTCTTTTGGGCACCCAGAAGTTTATATCTTAAATTTTACCAGGATTT  
GGGATTTATTTCTCATATTATTAGAAGAGAAAGAGGTAATAAAGAACTTTTGGAAATCTA  
GGAATAATTTATGCAATAACTACAATTGGATTATTGGGATTTATCGTTTGTAGCTCACCAT  
ATATTTACAGTAGGAATAGATGTAGACACACGAGCATATTTTACATCAGCTACAATAATT  
ATTGCTGTCCCACAGGAATTAATAATTTTGTAGCTGACTAGCATCAATAATAGGTTCAACA  
AATCGTATA---ACATCTAGAACTCTTTGAGCTCTAGGATTTATTTATTTTATTTACTTTA  
GGAGGAATAACAGGATTTATCTATCTAATGCCATTATTGATGTTATACTTCATGATACA

TATTATGTA  
>C.ohmorii JAP2 [GenBank:AB360977]  
GCAATCCTTCTACTATTATCCCTTCCAGTCTTAGCCGGAGCCATCACGATATTACTAACA  
GATCGAAATATTAATACTTCATTTTTTGGATCCTGCAGGAGGAGGACCCATTCTTTAC  
CAACATTTATTTTGATTTTTTGGGCACCCAGAAGTTTATATCTTAATTTTACCAGGATTT  
GGGATTATTTCTCATATTATTAGAAGAGAAAAGAGGTAAAAAGAATCTTTTGGAAATCTA  
GGAATAATTTATGCAATAACTACAATTGGATTATTGGGATTTATCGTTTGAGCTCACCAT  
ATATTTACAGTAGGAATAGATGTAGACACACGAGCATATTTTACATCAGCTACAATAATT  
ATTGCTGTCCCCACAGGAATTAATAATTTTGTAGCTGACTAGCATCAATAATAGGTTCAACA  
AATCGTATA---ACATCTAGAACTCTTTGAGCTCTAGGATTTATTTATTTTACTTTA  
GGAGGAATAACAGGTATTATCCTATCTAATGCCATTATTGATGTTATACTTCATGATACA  
TATTATGTA  
>C.oxystoma JAP1 [GenBank:AB360978]  
GCTATTCTTTTACTACTTTCTTTACCTGTTCTAGCTGGAGCTATTACTATATTATTA  
GACCGTAATATTAATACTTCATTTCTTTGACCCGTCAGGAGGGGGAGACCCATTCTTTAC  
CAACATTTATTTTGATTTTTTGGACACCCGTAAGTTTATATTTTAAATTTTACCAGGATTT  
GGAATAATTTCTCATATTATTAGCCAAGAAAAGAGGTAAAAAGGAAACATTTGGTTCCTTTA  
GGAATAATTTATGCTATACTAGCTATTGGGCTATTAGGATTTATTGTATGAGCTCATCAC  
ATATTTACTGTTGGAATAGACGTAGATACACGAGCTTATTTTACTTCAGCTACAATAATT  
ATTGCTGTACCAACCGGTATTAATAATTTTGTAGTTGATTAGCTACTCTTCATGGTACTCAA  
ATAACTTTA---ACTCCTTCTCTTTTATGAGCTTTAGGATTTGTATTCTTATTTACAGTA  
GGAGGTTTAAACAGGAGTAATTTTGCTAATTTCTTCTATTGATATTGTATTACATGATACA  
TATTATGTT  
>C.oxystoma JAP2 [GenBank:AB360979]  
GCTATTCTTTTACTACTTTCTTTACCTGTTCTAGCTGGAGCTATTACTATATTATTA  
GACCGTAATATTAATACTTCATTTCTTTGACCCGTCAGGAGGGGGAGACCCATTCTTTAC  
CAACATTTATTTTGATTTTTTGGACACCCGTAAGTTTATATTTTAAATTTTACCAGGATTT  
GGAATAATTTCTCATATTATTAGCCAAGAAAAGAGGTAAAAAGGAAACATTTGGTTCCTTTA  
GGAATAATTTATGCTATACTAGCTATTGGGCTATTAGGATTTATTGTATGAGCCCATCAC  
ATATTTACTGTTGGGATAGACGTAGATACACGAGCTTATTTTACTTCAGCTACAATAATT  
ATTGCTGTACCAACCGGTATTAATAATTTTGTAGTTGATTAGCTACTCTTCATGGTACTCAA  
ATAACTTTA---ACTCCTTCTCTTTTATGAGCTTTAGGATTTGTATTCTTATTTACAGTA  
GGGGGTTTAAACAGGAGTAATTTTGCTAATTTCTTCTATTGATATCGTATTACATGATACA  
TATTATGTT  
>C.oxystom JAP3 [GenBank:AB360980]  
GCTATTCTTTTACTACTTTCTTTACCTGTTCTAGCTGGAGCTATTACTATATTATTA  
GACCGTAATATTAATACTTCATTTCTTTGACCCGTCAGGAGGGGGAGACCCATTCTTTAC  
CAACATTTATTTTGATTTTTTGGACACCCGTAAGTTTATATTTTAAATTTTACCAGGATTT  
GGGATAATTTCTCATATTATTAGCCAAGAAAAGAGGTAAAAAGGAAACATTTGGTTCCTTTA  
GGAATAATTTATGCTATACTAGCTATTGGACTATTAGGATTTATTGTATGAGCTCATCAC  
ATATTTACTGTTGGGATAGACGTAGATACACGAGCTTATTTTACTTCAGCTACAATAATT  
ATTGCTGTACCAACCGGTATTAATAATTTTGTAGTTGATTAGCTACTCTTCATGGTACTCAA  
ATAACTTTA---ACTCCTTCTCTTTTATGAGCTTTAGGATTTGTATTCTTATTTACAGTA  
GGGGGTTTAAACAGGAGTAATTTTGCTAATTTCTTCTATTGATATCGTATTACATGATACA  
TATTATGTT  
>C.oxystoma JAP4 [GenBank:AB360981]  
GCTATTCTTTTACTACTTTCTTTACCTGTTCTAGCTGGAGCTATTACTATATTATTA  
GACCGTAATATTAATACTTCATTTCTTTGACCCGTCAGGAGGGGGAGACCCATTCTTTAC  
CAACATTTATTTTGATTTTTTGGACACCCGTAAGTTTATATTTTAAATTTTACCAGGATTT  
GGGATAATTTCTCATATTATTAGCCAAGAAAAGAGGTAAAAAGGAAACATTTGGTTCCTTTA  
GGAATAATTTATGCTATACTAGCTATTGGGTTATTAGGATTTATTGTATGAGCTCATCAC  
ATATTTACTGTTGGAATAGACGTAGATACACGAGCTTATTTTACTTCAGCTACAATAATT  
ATTGCTGTACCAACCGGTATTAATAATTTTGTAGTTGATTAGCTACTCTTCATGGTACTCAA  
ATAACTTTA---ACTCCTTCTCTTTTATGAGCTTTAGGATTTGTATTCTTATTTACAGTA  
GGGGGTTTAAACAGGAGTAATTTTGCTAATTTCTTCTATTGATATCGTATTACATGATACA  
TATTATGTT  
>C.oxystoma JAP5 [GenBank:AB360982]  
GCTATTCTTTTACTACTTTCTTTACCTGTTCTAGCTGGAGCTATTACTATATTATTA  
GACCGTAATATTAATACTTCATTTTTTGGATCCTGCAGGAGGGGGAGACCCATTCTTTAC  
CAACATTTATTTTGATTTTTTGGACACCCGTAAGTTTATATTTTAAATTTTACCAGGATTT  
GGGATAATTTCTCATATTATTAGCCAAGAAAAGAGGTAAAAAGGAAACATTTGGTTCCTTTA  
GGAATAATTTATGCTATACTAGCTATTGGGTTATTAGGATTTATTGTATGAGCTCATCAC  
ATATTTACTGTTGGAATAGACGTAGATACACGAGCTTATTTTACTTCAGCTACAATAATT  
ATTGCTGTACCAACCGGTATTAATAATTTTGTAGTTGATTAGCTACTCTTCATGGTACTCAA  
ATAACTTTA---ACTCCTTCTCTTTTATGAGCTTTAGGATTTGTATTCTTATTTACAGTA  
GGGGGTTTAAACAGGAGTAATTTTGCTAATTTCTTCTATTGATATCGTATTACATGATACA  
TATTATGTT

ATTGCTGTACCAACCGGTATTTAAATTTTTAGTTGATTAGCTACTCTTCATGGTACTCAA  
ATAACTTTA---ACTCCTTCTCTTTTATGAGCTTTAGGATTTGTATTCCTATTTACAGTA  
GGAGGTTTAAACAGGAGTAATTTTGGCTAATTCCTTCTATTGATATCGTATTACATGATACA  
TATTATGTT

>C.oxystoma JAP6 [GenBank:AB360983]

GCTATTCTTTTACTACTTTCTTTACCTGTTCTAGCTGGAGCTATTACTATATTATTA  
GACCGTAATATTAATACTTCATTTTTTGGACCTGCAGGAGGGGGAGACCCATTTCTTTAC  
CAACATTTATTTTGGATTTTTTGGACACCCCTGAAGTTTATATTTTAAATTTTACCAGGATTT  
GGGATAATTTCTCATATTATTAGCCAAGAAAGAGGTAAAAAGGAAACATTTGGTTCTTTA  
GGAATAATTTATGCTATACTAGCTATTGGGCTATTAGGATTTATTGTATGAGCTCATCAC  
ATATTTACTGTCGGGATAGACGTAGATACACGAGCTTATTTTACTTCAGCTACAATAATT  
ATTGCTGTACCAACCGGTATTTAAATTTTTAGTTGATTAGCTACTCTTCATGGTACTCAA  
ATAACTTTA---ACTCCTTCTCTTTTATGAGCTTTAGGATTTGTATTCCTATTTACAGTA  
GGAGGTTTAAACAGGAGTAATTTTGGCTAATTCCTTCTATTGATATCGTATTACATGATACA  
TATTATGTT

>C.oxystoma JAP7 [GenBank:AB360984]

GCTATTCTTTTACTACTTTCTTTACCTGTTCTAGCTGGAGCTATTACTATATTATTA  
GACCGTAATATTAATACTTCATTTCTTTGACCCCTGCAGGAGGGGGAGACCCATTTCTTTAC  
CAACATTTATTTTGGATTTTTTGGACACCCCTGAAGTTTATATTTTAAATTTTACCAGGATTT  
GGGATAATTTCTCATATTATTAGCCAAGAAAGAGGTAAAAAGGAAACATTTGGTTCTTTA  
GGAATAATTTATGCTATACTAGCTATTGGGCTATTAGGATTTATTGTATGAGCTCATCAC  
ATATTTACTGTTGGAATAGACGTAGATACACGAGCTTATTTTACTTCAGCTACAATAATT  
ATTGCTGTACCAACCGGTATTTAAATTTTTAGTTGATTAGCTACTCTTCATGGTACTCAA  
ATAACTTTA---ACTCCTTCTCTTTTATGAGCTTTAGGATTTGTATTCCTATTTACAGTA  
GGGGGTTTAAACAGGAGTAATTTTGGCTAATTCCTTCTATTGATATCGTATTACATGATACA  
TATTATGTT

>C.oxystoma JAP8 [GenBank:AB360985]

GCTATTCTTTTACTACTTTCTTTACCTGTTCTAGCTGGGGCTATTACTATATTATTA  
GACCGTAATATTAATACTTCATTTCTTTGACCCCTGCAGGAGGGGGAGACCCATTTCTTTAC  
CAACATTTATTTTGGATTTTTTGGACACCCCTGAAGTTTATATTTTAAATTTTACCAGGATTC  
GGGATAATTTCTCATATTATTAGCCAAGAAAGAGGTAAAAAGGAAACATTTGGTTCTTTA  
GGAATAATTTATGCTATACTAGCTATTGGGCTATTAGGATTTATTGTATGAGCTCATCAC  
ATATTTACTGTTGGGATAGACGTAGATACACGAGCTTATTTTACTTCAGCTACAATAATT  
ATTGCTGTACCAACCGGTATTTAAATTTTTAGTTGATTAGCTACTCTTCATGGTACTCAA  
ATAACTTTA---ACTCCTTCTCTTTTATGAGCTTTAGGATTTGTATTCCTATTTACAGTA  
GGGGGTTTAAACAGGAGTAATTTTGGCTAATTCCTTCTATTGATATCGTATTACATGATACA  
TATTATGTT

>C.peregrinus JAP [GenBank:AB361003]

GCTATTCTTTTACTTTTATCTCTTCCAGTTCTAGCCGGAGCTATTACTATACTTTTAAACA  
GATCGAAATATTAATACTACTTTCTTTGACCCACAGGAGGAGGAGACCCAATTTTATAC  
CAACATTTATTTTGGATTTTTTGGACATCCAGAAGTCTATATTCCTTATTTTACCTGGATTT  
GGTATTGTTTCTCATATTATATCTCAAGAAAGAGGAAAAAGGAAGCTTTTGGGGCATTA  
GGAATAATTTATGCTATAACAACATTTGGACTTTTAGGATTTATTGTATGAGCACACCAC  
ATATTTACAGTTGGAATAGATGTTGATACACGAGCATATTCACCTTCGCTACAATAATT  
ATTGCTATTTCCACAGGAATTTAAATTTTTAGATGATTAGCAACAATTTTAGGATCCCT  
CTTTCTTCAATTAATCCTCCTTTAATATGATCATTAGGATTTGTATTCCTTATTTACATATT  
GGGGGTTTAACTGGAATTATCCTAGCCAATTCATCAATTGATACTGTTTTACACGATACT  
TATTATGTA

>C.pictimargo JAP1 [GenBank:AB646612]

GCCATCTTACTATTACTTTTACTTACCTGTTCTTAGCAGGAGCAATTACTATACTTTTGGACC  
GATCGAAATATTAATACTTCTTTTGGACCCAGCTGGGGGAGGAGACCCAATTTCTTTAC  
CAACACTTATTTTGGATTTCTTTGGACACCCAGAAGTATATATTTTAAATTCCTTCCAGGGTTT  
GGTATAATTTCTCATATTATTAGTCAAGAAAGAGGTAAAAAGAACTTTTGGGGCTCTT  
GGTATAATTTATGCAATATTAGCTATTGGACTATTAGGATTTATTGTATGGGCCACCAC  
ATATTTACAGTAGGAATAGATGTAGATACACGAGCATATTTTACCTTCAGCTACTATAATT  
ATTGCTGTACCTACTGGTATTTAAATTTTTAGTTGACTTGCAACTCTTCACGGAACACAA  
ATAACCTT---AATCCATCTTTACTATGATCCCTAGGATTTGTATTTTATTTACTGTG  
GGAGGATTAACCTGGAGTAATTTAGCTAATTCCTTCTATTGACATTTCTTCATGATACT  
TATTATGTA

>C.pictimargo JAP2 [GenBank:AB646613]

GCCATTTTACTATTACTTTTACTTACCTGTTCTTAGCAGGAGCAATTACTATACTTTTAACT  
GATCGAAATATTAATACTTCTTTTGGACCCAGCTGGAGGAGGAGATCCAATTTCTTTAC  
CAACACTTATTTTGGATTTCTTTGGACACCCAGAAGTATATATTTTAAATTCCTTCCAGGATTT

GGTATAATTTCTCATATTATTAGTCAAGAAAGAGGTAAAAAGAACTTTTGGGGCTCTT  
GGTATAATTTATGCAATATTAGCTATTGGGCTATTAGGATTTATTGTATGAGCCCACCAC  
ATATTTACAGTAGGAATAGATGTAGACACACGAGCATATTTACCTCAGCTACTATAATT  
ATTGCTGTACCTACTGGTATTTAAATTTTATGTTGACTTGCGACTCTCCACGGAACACAA  
ATAACCTT---AACCCATCTTTACTATGATCCCTAGGATTTGTATTTTTTACTGTG  
GGAGGATTAACCTGGAGTAATTTTGGCTAATTTCTTCTATTGACATTGTTCTTCATGATACT  
TATTATGTA

>C.punctatus JAP1 [GenBank:AB360988]

GCTATTTTACTTCTTTTATCTTTACCAGTTTTAGCCGGAGCTATTACAATACTATTAACA  
GACCGAAATATTAATACTTCATTTTTGACCCAGCAGGAGGTGGAGACCCTATTTTATAT  
CAACATTTATTTTGATTTTTTCGGGCACCCTGAGGTATACATTTTAATTTTACCCGGATTC  
GGGATAATTTCTCACATTATTGCCCAAGAAAGAGGGAAAAAGAACTTTTGGGGCCTTA  
GGTATAATTTATGCCATATTAGCCATTGGCCTATTAGGATTCATTGTTTGAGCTCATCAT  
ATATTTACTGTAGGAATAGATGTAGACACCCGGGCTTATTTACCTCAGCAACTATAATT  
ATTGCTGTACCAACAGGAATTTAAATTTTATGTTGACTTGCTACTCTCCATGGTACTCAA  
ATAAATTTA---AATGCATCTCTTTTGTGATCATTAGGTTTTGTATTTTTTACTAGTA  
GGGGGACTTACCGGAGTAATTTTAGCTAATTCATCAATTGACATTGTTCTTCATGATACT  
TATTATGTA

>C.punctatus JAP2 [GenBank:AB360989]

GCTATTTTACTTCTTTTATCTTTACCAGTTTTAGCCGGAGCTATTACAATACTATTAACA  
GACCGAAACATTAATACTTCATTTTTGACCCAGCAGGAGGTGGAGACCCTATTTTATAT  
CAACATTTATTTTGATTTTTTCGGGCACCCTGAGGTATACATTTTAATTTTACCCGGATTC  
GGGATAATTTCTCACATTATTGCCCAAGAAAGAGGGAAAAAGAACTTTTGGGGCCTTA  
GGTATAATTTATGCCATACTAGCCATTGGCCTATTAGGATTCATTGTTTGAGCTCATCAT  
ATATTTACTGTAGGAATAGATGTAGACACCCGGGCTTATTTACCTCAGCAACTATAATT  
ATTGCTGTACCAACAGGAATTTAAATTTTATGTTGACTTGCTACTCTCCATGGTACTCAA  
ATAAATTTA---AATGCATCTCTTTTATGATCATTAGGTTTTGTATTTTTTACTAGTA  
GGGGGACTTACCGGAGTAATTTTAGCTAATTCATCAATTGACATTGTTCTTCATGATACT  
TATTATGTA

>C.wadai JAP1 [GenBank:AB360996]

GCTATTTTACTATTATTATCTTTACCAGTTTTAGCCGGAGCTATCACAATACTTTTAACT  
GATCGAAATATTAATACTTCCTTTTTTCGATCCAGCAGGAGGAGGTGACCCATTTTATAT  
CAACATTTATTTTGATTTCTTTGGTCATCCAGAAGTATATATTTTAATTTTACCTGGATTT  
GGAATAATCTCCCATATTTTAAGTCAAGAAAGAGGGAAAAAGGAAACATTCGGAGCTTTA  
GGGATAATTTATGCTATACTAGCAATTGGATTATTAGGTTTTTATTGTTTGAGCTCATCAT  
ATATTTACAGTTGGAATAGACGTAGACACCCGAGCTTATTTTACATCAGCAACTATAATT  
ATTGCTGTACCTACTGGAATTTAAATTTTATGTTGATTAGCAACAATCTATGGAACCAA  
TTAACTCTT---AATGCCTCATTACTTTGATCTCTAGGATTTGTATTTTTTACTATG  
GGAGGATTAACAGGAGTAGTGCTAGCTAATTTCTTCTATTGATGTAGTTCTTCATGATACT  
TACTATGTA

>C.wadai JAP2 [GenBank:AB360997]

GCTATTTTACTATTATTATCTTTACCAGTTTTAGCCGGAGCTATCACAATACTTTTAACT  
GATCGAAATATTAATACTTCCTTTTTTCGATCCAGCAGGAGGAGGTGACCCATTTTATAT  
CAACATTTATTTTGATTTCTTTGGTCATCCAGAAGTATATATTTTAATTTTACCTGGATTT  
GGAATAATCTCCCATATTTTAAGTCAAGAAAGAGGGAAAAAGGAAACATTCGGAGCTTTA  
GGGATAATTTATGCTATACTAGCAATTGGATTATTAGGTTTTTATTGTTTGAGCTCATCAT  
ATATTTACAGTTGGAATAGACGTAGACACCCGAGCTTATTTTACATCAGCAACTATAATT  
ATTGCTGTACCTACTGGAATTTAAATTTTATGTTGATTAGCAACAATCTATGGAACCAA  
TTAACTCTT---AATGCCTCATTACTTTGATCTCTAGGATTTGTATTTTTTACTATG  
GGAGGATTAACAGGAGTAGTGCTAGCTAATTTCTTCTATTGATGTAGTTCTTCATGATACT  
TACTATGTA

>C.wadai JAP3 [GenBank:AB361005]

GCTATTTTACTATTATTATCTTTACCAGTTTTAGCCGGAGCTATCACAATACTTTTAACT  
GATCGAAATATTAATACTTCCTTTTTTCGATCCAGCAGGAGGAGGTGACCCATTTTATAT  
CAACATTTATTTTGATTTCTTTGGTCATCCAGAAGTATATATTTTAATTTTACCTGGATTT  
GGAATAATCTCCCATATTTTAAGTCAAGAAAGAGGGAAAAAGGAAACATTCGGAGCTTTA  
GGGATAATTTATGCTATACTAGCAATTGGATTATTAGGTTTTTATTGTTTGAGCTCATCAT  
ATATTTACAGTTGGAATAGACGTAGACACCCGAGCTTATTTTACATCAGCAACTATAATT  
ATTGCTGTACCTACTGGAATTTAAATTTTATGTTGATTAGCAACAATCTATGGAACCAA  
TTAACTCTT---AATGCCTCATTACTTTGATCTCTAGGATTTGTATTTTTTACTATG  
GGAGGATTAACAGGAGTAGTGCTAGCTAATTTCTTCTATTGATGTAGTTCTTCATGATACT  
TACTATGTA

>Anopheles gambiae [GenBank:Nc\_002084][1991..2537]

GCAGTATTATTATTATTATCATTACCAGTATTAGCAGGAGCTATTACTATATTATTA  
GATCGAAATTTAAATACATCTTTCTTTGATCCAGCAGGAGGAGGTGATCCAATTTTATAT  
CAACACTTATTCTGATTTTTTTGGTCATCCAGAAGTATATATTTTAAATTTTACCTGGATTC  
GGAATAATTTTCGCATATTATTACTCAAGAAAGTGAAAGAAGGAAACATTTGGAAACTTA  
GGAATAATCTATGCTATACTAGCAATTGGCTTACTTGGATTTATTGTTTTGAGCTCATCAT  
ATATTTACAGTTGGAATAGACGTTGATACTCGAGCTTACTTTACATCAGCAACTATAATT  
ATTGCTGTGCCAACTGGAATTAAGATTTTTAGTTGATTAGCTACATTACACGGAACACAA  
TTGACTTAT---AGCCAGCTATATTGTGAGCATTTGGATTCGTTTTCTTATTTACAGTT  
GGTGGTCTAACAGGAGTTGTACTAGCTAATTCATCTATTGATATTGTTCTTCACGATACT  
TATTATGTT

>Anopheles quadriannulatus [GenBank:DQ792581]

GCAGTATTATTATTATTATCATTACCAGTATTAGCAGGAGCTATTACTATATTATTA  
GATCGAAATTTAAATACATCTTTCTTTGATCCAGCAGGAGGAGGTGACCCAATTTTATAC  
CAACATTTATTCTGATTTTTTTGGTCATCCAGAAGTATATATTTTAAATTTTACCTGGATTC  
GGAATAATTTTCACATATTATTACTCAAGAAAGTGAAAGAAGGAAACATTTGGAAACTTA  
GGGATAATCTATGCTATACTAGCAATTGGTTTACTTGGATTTATTGTTTTGAGCCCATCAT  
ATATTTACAGTTGGAATAGACGTTGATACTCGAGCTTACTTTACATCAGCAACTATAATT  
ATTGCTGTACCAACTGGAATTAAGATTTTTAGTTGATTAGCTACATTACACGGAACACAA  
TTAACTTAT---AGCCAGCTATATTATGAGCATTTGGATTCGTTTTCTTATTTACAGTT  
GGTGGTCTAACAGGAGTTGTACTAGCTAATTCATCTATTGATATTGTTCTTCACGATACT  
TATTATGTT

>Anopheles dirus\_D [GenBank:AJ877572]

GCAATTTTATTACTTTTTATCTTTACCCGTATTAGCAGGAGCAATTACTATATTATTAACA  
GACCGAAATTTAAATACTTCATTTTTTTGATCCAGCTGGTGGAGGAGATCCTATTTTATAT  
CAACACTTATTCTGATTTTTTCGGACATCCAGAAGTTTACATTTTAAATTTTACCTGGATTT  
GGAATAATTTCTCATATTATTACTCAAGAAAGAGGAAAGAAGGAAACATTTGGAAATTTA  
GGAATAATTTATGCTATATTAGCAATTGGATTATTAGGATTTATTGTTTTGAGCTCATCAT  
ATATTTACTGTTGGAATAGACGTAGATACTCGAGCTTATTTTACTTCTGCAACTATAATT  
ATTGCTGTACCAACTGGAATTAATAATTTTTAGTTGATTAGCAACATTACACGGAACACAA  
TTAACTTAT---AGACCAGCTATACTTTGAGCATTTGGATTTGTTTTTTTTTATTTACAGTA  
GGGGGTTTAACTGGAGTTGTACTGGCTAATTCATCAATTTGATATTGTATTACATGATACT  
TATTATGTA

>Anopheles janconnae [GenBank:HQ335348]

GCTGTATTATTATTACTATCATTTACCTGTATTAGCTGGAGCTATTACTATATTATTA  
GATCGAAATTTAAACACATCATTTTTTTGATCCAGCCGGAGGAGGTGATCCTATTTTATAC  
CAACATTTATTCTGATTTTTTTGGACATCCAGAAGTTTACATTTTAAATTTTACCAGGATTT  
GGAATAATTTCTCACATTTATTACTCAAGAAAGAGGAAAGAAGGAAACATTTGGAAATTTA  
GGAATAATTTATGCTATATTAGCTATTGGATTATTAGGATTTATTGTTTTGAGCTCATCAT  
ATATTTACTGTTGGGATAGATGTAGATACACGAGCTTACTTCACATCAGCTACTATAATT  
ATTGCTGTACCTACAGGAATTAATAATTTTTAGTTGATTAGCTACATTACATGGAACACAG  
CTAACGTAT---AGCCAGCTATACTTTGAGCATTTGGATTCGTATTTTTTATTTACTGTA  
GGAGGACTAACTGGAGTAGTTTTAGCTAATTCCTTCTATTGATATTGTATTACATGATACT  
TATTATGTA
