# Supplementary material for: Population Genetic Structure and Potential Incursion Pathways of the Bluetongue Virus Vector Culicoides brevitarsis (Diptera: Ceratopogonidae) in Australia
Source: PubMed Central journal article supplement (PMC4714883; doi:10.1371/journal.pone.0146699), 2016-01-15
Supplement: pone.0146699.s002.pdf [file pone.0146699.s002.pdf]

**S2 File:** Alignment of 184 amino acids of partial *Culicoides* mtDNA COI gene in fasta+gap format for used in phylogenetic analysis.

```
>Cbrev-01 [GenBank:KP201844]
AIIIIISLPVLAGAITMLLTDRNINTSFFDPAGGGDPILYQHLFWFFGHPEVYILILPGF
GIVSHIICQESGKKEAFGLGMMYAIAAIGLLGFIVWAHMFVGLDVDTRAYFTSATMI
IAVPTGIKIFSWMATMYGTQLNL-TPALLWSLGFVFLFTVGGTGVILANSSLDIVLHDT
YYV
>Cbrev-02 [GenBank:KP201845]
AIIIIISLPVLAGAITMLLTDRNINTSFFDPAGGGDPILYQHLFWFFGHPEVYILILPGF
GIVSHIICQESGKKEAFGLGMMYAIAAIGLLGFIVWAHMFVGLDVDTRAYFTSATMI
IAVPTGIKIFSWMATMYGTQLNL-TPALLWSLGFVFLFTVGGTGVILANSSLDIVLHDT
YYV
>Cbrev-03 [GenBank:KP201846]
AIIIIISLPVLAGAITMLLTDRNINTSFFDPAGGGDPILYQHLFWFFGHPEVYILILPGF
GIVSHIICQESGKKEAFGLGMMYAIAAIGLLGFIVWAHMFVGLDVDTRAYFTSATMI
IAVPTGIKIFSWMATMYGTQLNL-TPALLWSLGFVFLFTVGGTGVILANSSLDIVLHDT
YYV
>Cbrev-04 [GenBank:KP201847]
AIIIIISLPVLAGAITMLLTDRNINTSFFDPAGGGDPILYQHLFWFFGHPEVYILILPGF
GIVSHIICQESGKKEAFGLGMMYAIAAIGLLGFIVWAHMFVGLDVDTRAYFTSATMI
IAVPTGIKIFSWMATMYGTQLNL-TPALLWSLGFVFLFTVGGTGVILANSSLDIVLHDT
YYV
>Cbrev-05 [GenBank:KP201848]
AIIIIISLPVLAGAITMLLTDRNINTSFFDPAGGGDPILYQHLFWFFGHPEVYILILPGF
GIVSHIICQESGKKEAFGLGMMYAIAAIGLLGFIVWAHMFVGLDVDTRAYFTSATMI
IAVPTGIKIFSWMATMYGTQLNL-TPALLWSLGFVFLFTVGGTGVILANSSLDIVLHDT
YYV
>Cbrev-06 [GenBank:KP201849]
AIIIIISLPVLAGAITMLLTDRNINTSFFDPAGGGDPILYQHLFXFFGHPEVYILILPGF
GIVSHIICQESGKKEAFGLGMMYAIAAIGLLGFIVWAHMFVGLDVDTRAYFTSATMI
IAVPTGIKIFSWMATMYGTQLNL-TPALLWSLGFVFLFTVGGTGVILANSSLDIVLHDT
YYV
>Cbrev-07 [GenBank:KP2018450]
AIIIIISLPVLAGAITMLLTDRNINTSFFDPAGGGDPILYQHLFWFFGHPEVYILILPGF
GIVSHIICQESGKKEAFGLGMMYAIAAIGLLGFIVWAHMFVGLDVDTRAYFTSATMI
IAVPTGIKIFSWMATMYGTQLNL-TPALLWSLGFVFLFTVGGTGVILANSSLDIVLHDT
YYV
>Cbrev-08 [GenBank:KP2018451]
AIIIIISLPVLAGAITMLLTDRNINTSFFDPAGGGDPILYQHLFWFFGHPEVYILILPGF
GIVSHIICQESGKKEAFGLGMMYAIAAIGLLGFIVWAHMFVGLDVDTRAYFTSATMI
IAVPTGIKIFSWMATMYGTQLNL-TPALLWSLGFVFLFTVGGTGVILANSSLDIVLHDT
YYG
>Cbrev-09 [GenBank:KP2018452]
AIIIIISLPVLAGAITMLLTDRNINTSFFDPAGGGDPILYQHLFWFFGHPEVYILILPGF
GIVSHIICQESGKKEAFGLGMMYAIAAIGLLGFIVWAHMFVGLDVDTRAYFTSATMI
IAVPTGIKIFSWMATMYGTQLNL-TPALLWSLGFVFLFTVGGTGVILANSSLDIVLHDT
YYV
>Cmarksi-01 [GenBank:KP2018453]
AIIIFLSLPVLAGAITMLLTDRNINTSFFDPAGGGDPILYQHLFWFFGHPEVYILILPGF
GMISHIISQESGKKEAFGLGMMYAIAAIGLLGFIVWAHMFVGLDVDTRAYFTSATMI
IAVPTGIKIFSWLATLHGTQMTL-NPSLLWALGFVFLFTVGGTGVILANSSIDIVLHDT
YYV
>Cmarksi-03 [GenBank:KP2018454]
AIIIFLSLPVLAGAITMLLTDRNINTSFFDPAGGGDPILYQHLFWFFGHPEVYILILPGF
GMISHIISQESGKKEAFGLGMMYAIAAIGLLGFIVWAHMFVGLDVDTRAYFTSATMI
IAVPTGIKIFSWLATLHGTQMTL-NPSLLWALGFVFLFTVGGTGVILANSSIDIVLHDT
YYV
>Cmarksi-4 [GenBank:KP2018455]
AIIIFLSLPVLAGAITMLLTDRNINTSFFDPAGGGDPILYQHLFWFFGHPEVYILILPGF
GMISHIISQESGKKEAFGLGMMYAIAAIGLLGFIVWAXHMFVGLDVDTRAYFTSATMI
IAVPTGIKIFSWLATLHGTQMTL-NPSLLWALGFVFLFTVGGTGVILANSSIDIVLHDT
```

YYV  
>Cmarksi-05 [GenBank:KP2018456]  
AILLFLSLPVLGAIITMLLTDRNINTSFFDPAGGGDPILYQHLEWFFFGHPEVYILILPGF  
GMISHIISQESGKKETFGSLGMIYAMLAIGLLGFIVWAXHMFTVGMVDVTRAYFTSATMI  
IAVPTGIKIFSWLATLHGTQMTL-NPSLLWALGFVFLFTVGGTGVILANSSIDIVLHDT  
YYV  
>Cmarksi-06 [GenBank:KP2018457]  
AILLFLSLPVLGAIITMLLTDRNINTSFFDPAGGGDPILYQHLEWFFFGHPEVYILILPGF  
GMISHIISQESGKKETFGSLGMIYAMLAIGLLGFIVWAXHMFTVGMVDVTRAYFTSATMI  
IAVPTGIKIFSWLATLHGTQMTL-NPSLLWALGFVFLFTVGGTGVILANSSIDIVLHDT  
YYV  
>Cmarksi-07 [GenBank:KP2018458]  
AILLFLSLPVLGAIITMLLTDRNINTSFFDPAGGGDPILYQHLEWFFFGHPEVYILILPGF  
GMISHIISQESGKKETFGSLGMIYAMLAIGLLGFIVWAXHMFTVGMVDVTRAYFTSATMI  
IAVPTGIKIFSWLATLHGTQMTL-NPSLLWALGFVFLFTVGGTGVILANSSIDIVLHDT  
YYV  
>Cmarksi-08 [GenBank:KP2018459]  
AILLFLSLPVLGAIITMLLTDRNINTSFFDPAGGGDPILYQHLEWFFFGHPEVYILILPGF  
GMISHIISQESGKKETFGSLGMIYAMLAIGLLGFIVWAXHMFTVGMVDVTRAYFTSATMI  
IAVPTGIKIFSWLATLHGTQMTL-NPSLLWALGFVFLFTVGGTGVILANSSIDIVLHDT  
YYV  
>Cmarksi-09 [GenBank:KP2018460]  
AILLFLSLPVLGAIITMLLTDRNINTSFFDPAGGGDPILYQHLEWFFFGHPEVYILILPGF  
GMISHIISQESGKKETFGSLGMIYAMLAIGLLGFIVWAXHMFTVGMVDVTRAYFTSATMI  
IAVPTGIKIFSWLATLHGTQMTL-NPSLLWALGFVFLFTVGGTGVILANSSIDIVLHDT  
YYV  
>Cmarksi-10 [GenBank:KP2018461]  
AILLFLSLPVLGAIITMLLTDRNINTSFFDPAGGGDPILYQHLEWFFFGHPEVYILILPGF  
GMISHIISQESGKKETFGSLGMIYAMLAIGLLGFIVWAXHMFTVGMVDVTRAYFTSATMI  
IAVPTGIKIFSWLATLHGTQMTL-NPSLLWALGFVFLFTVGGTGVILANSSIDIVLHDT  
YYV  
>Cmarksi-11 [GenBank:KP2018462]  
AILLFLSLPVLGAIITMLLTDRNINTSFFDPAGGGDPILYQHLEWFFFGHPEVYILILPGF  
GMISHIISQESGKKETFGSLGMIYAMLAIGLLGFIVWAXHMFTVGMVDVTRAYFTSATMI  
IAVPTGIKIFSWLATLHGTQMTL-NPSLLWALGFVFLFTVGGTGVILANSSIDIVLHDT  
YYV  
>Cmarksi-12 [GenBank:KP2018463]  
AILLFLSLPVLGAIITMLLTDRNINTSFFDPAGGGDPILYQHLEWFFFGHPEVYILILPGF  
GMISHIISQESGKKETFGSLGMIYAMLAIGLLGFIVWAXHMFTVGMVDVTRAYFTSATMI  
IAVPTGIKIFSWLATLHGTQMTL-NPSLLWALGFVFLFTVGGTGVILANSSIDIVLHDT  
YYV  
>Cmarksi-13 [GenBank:KP2018464]  
AILLFLSLPVLGAIITMLLTDRNINTSFFDPAGGGDPILYQHLEWFFFGHPEVYILILPGF  
GMISHIISQESGKKETFGSLGMIYAMLAIGLLGFIVWAXHMFTVGMVDVTRAYFTSATMI  
IAVPTGIKIFSWLATLHGTQMTL-NPSLLWALGFVFLFTVGGTGVILANSSIDIVLHDT  
YYV  
>Cmarksi-14 [GenBank:KP2018465]  
AILLFLSLPVLGAIITMLLTDRNINTSFFDPAGGGDPILYQHLEWFFFGHPEVYILILPGF  
GMISHIISQESGKKETFGSLGMIYAMLAIGLLGFIVWAXHMFTVGMVDVTRAYFTSATMI  
IAVPTGIKIFSWLATLHGTQMTL-NPSLLWALGFVFLFTVGGTGVILANSSIDIVLHDT  
YYV  
>Cmarksi-15 [GenBank:KP2018466]  
AILLFLSLPVLGAIITMLLTDRNINTSFFDPAGGGDPILYQHLEWFFFGHPEVYILILPGF  
GMISHIISQESGKKETFGSLGMIYAMLAIGLLGFIVWAXHMFTVGMVDVTRAYFTSATMI  
IAVPTGIKIFSWLATLHGTQMTL-NPSLLWALGFVFLFTVGGTGVILANSSIDIVLHDT  
YYV  
>Cmarksi-16 [GenBank:KP2018467]  
AILLFLSLPVLGAIITMLLTDRNINTSFFDPAGGGDPILYQHLEWFFFGHPEVYILILPGF  
GMISHIISQESGKKETFGSLGMIYAMLAIGLLGFIVWAXHMFTVGMVDVTRAYFTSATMI  
IAVPTGIKIFSWLATLHGTQMTL-NPSLLWALGFVFXFTVGGTGVILANSSIDIVLHDT  
YYV  
>Cpallid-221 [GenBank:KP2018468]  
AILLFLSLPVLGAIITMLLTDRNINTSFFDPAGGGDPILYQHLEWFFFGHPEVYILILPGF

GMISHIISQESGKKETFGSLGMIYAMLAIGLLGFIVWAHMFVGMVDVTRAYFTSATMI  
IAVPTGIKIFSWLATLHGTQMTL-NPSLLWALGFVFLFTVGGTGVILANSSIDIVLHDT  
YYV

>Chenryi-02 [GenBank:KP2018469]  
AIIIIIIISLPVLAGAITMIIITDRNINTSFFDPAGGGDPILYQHLFWFFGHPEVYIILILPGF  
GMISHIISQESGKKETFGSLEMIYAMLAIGLLGFIVWAHMFVGMVDVTRAYFTSATMI  
IAVPTGIKIFSWLATLHGTQMTL-NPSLLWALEWVFLFTVGGTGVILANSSXXXXXXXXXX  
XXX

>Chenryi-01 [GenBank:KP2018470]  
AIIIIIIISLPVLAGAITMIIITDRNINTSFFDPAGGGDPILYQHLFWFFGHPEVYIILILPGF  
GMISHIISQESGKKETFGSLGMIYAMLAIGLLGFIVWAHMFVGMVDVTRAYFTSATMI  
IAVPTGIKIFSWLATLHGTQMTL-NPSLLWALGFVFLFTVGGTGVILANSSIDIVLHDT  
YYV

>Cbundye-01 [GenBank:KP2018471]  
XXXXXXXXXXXXXXXXXXXXLTDNRNINTSFFDPAGGGDSILYQHLFWFFGHPEVYIILILPGF  
GMVSHIISQESGKKETFGSLGMIYAMLAIGLLGFIVWAHMFVGMVDVTRAYFTSATMI  
IAVPTGIKIFSWLATLHGTQMTL-NASLLWALGFVFLFTVGSITGVILANSSIXIGLHDT  
YYV

>Cbunroo-01 [GenBank:KP2018472]  
AIIIIIIISLPVLAGAITMIIITDRNINTSFFDPAGGGDPILYQHLFWFFGHPEVYIILILPGF  
GMISHIISQESGKKETFGSLGMIYAMLAIGLLGFIVWAHMFVGMVDVTRAYFTSATMI  
IAVPTGIKIFSWLATLHGTQMTL-NPSLLWALGFVFLFTVGGTGVILANSSIDIVLHDT  
YYV

>C.actoni JAP [GenBank:AB360971]  
ALLIIIIISLPVLAGAITMIIITDRNFNTSFFDPAGGGDPVLYQHLFWFFGHPEVYIILILPAF  
GIISHIMAGESGKKEPFGVLAMQYAIISAIGLLGFFVWAHMFVGLDVTTRAYFSAATMV  
IGIPTGIKIFSWLATIYGSPWQF-TPAMLLWALGFIFLFTLGGTGVILANSSIDAIVLHDT  
YYV

>C.arakawae JAP 1 [GenBank:AB360972]  
AIIIIIIISLPVLAGAITMIIITDRNINTSFFDPAGGGDPILYQHLFWFFGHPEVYIILILPGF  
GMISHIISQESGKKETFGALGMIYAMLAIGLLGFIVWAHMFVGMVDVTRAYFTSATMI  
IAVPTGIKIFSWLATLHGTQMTL-TPSLLWALGFVFLFTVGGTGVILANSSIDIILHDT  
YYV

>C.arakawae JAP 2 [GenBank:AB360973]  
AIIIIIIISLPVLAGAITMIIITDRNINTSFFDPAGGGDPILYQHLFWFFGHPEVYIILILPGF  
GMISHIISQESGKKETFGALGMIYAMLAIGLLGFIVWAHMFVGMVDVTRAYFTSATMI  
IAVPTGIKIFSWLATLHGTQMTL-TPSLLWALGFVFLFTVGGTGVILANSSIDIILHDT  
YYV

>C.arakawae JAP3 [GenBank:AB360974]  
AIIIIIIISLPVLAGAITMIIITDRNINTSFFDPAGGGDPILYQHLFWFFGHPEVYIILILPGF  
GMISHIISQESGKKETFGALGMIYAMLAIGLLGFIVWAHMFVGMVDVTRAYFTSATMI  
IAVPTGIKIFSWLATLHGTQMTL-TPSLLWALGFVFLFTVGGTGVILANSSIDIILHDT  
YYV

>C.arakawae JAP4 [GenBank:AB360975]  
AIIIIIIISLPVLAGAITMIIITDRNINTSFFDPAGGGDPILYQHLFWFFGHPEVYIILILPGF  
GMISHIISQESGKKETFGALGMIYAMLAIGLLGFIVWAHMFVGMVDVTRAYFTSATMI  
IAVPTGIKIFSWLATLHGTQMTL-TPSLLWALGFVFLFTVGGTGVILANSSIDIILHDT  
YYV

>C.arakawae JAP5 [GenBank:AB361004-Yng05\_2]  
AIIIIIIISLPVLAGAITMIIITDRNINTSFFDPAGGGDPILYQHLFWFFGHPEVYIILILPGF  
GMISHIISQESGKKETFGALGMIYAMLAIGLLGFIVWAHMFVGMVDVTRAYFTSATMI  
IAVPTGIKIFSWLATLHGTQMTL-TPSLLWALGFVFLFTVGGTGVILANSSIDIILHDT  
YYV

>C.verbosus [GenBank:AB646615]  
AIIIIIIISLPVLAGAITMIIITDRNINTSFFDPAGGGDPILYQHLFWFFGHPEVYIILILPGF  
GMISHIISQESGKKETFGSLGMIYAMLAIGLLGFIVWAHMFVGMVDVTRAYFTSATMI  
IAVPTGIKIFSWLATLHGTQMTL-NPSLLWALGFVFLFTVGGTGVILANSSIDIVLHDT  
YYV

>C.brevitarsis Cbrev-AB1 [GenBank:AB360994]  
AIIIIIIISLPVLAGAITMIIITDRNINTSFFDPAGGGDPILYQHLFWFFGHPEVYIILILPGF  
GIVSHIISQESGKKEAFVGLGMMYAIAAIIGLLGFIVWAHMFVGLDVTTRAYFTSATMI  
IAVPTGIKIFSWMATMYGTQLNL-TPALLWALGFVFLFTVGGTGVVLANSSIDIILHDT  
YYV

>C.brevitarsis Cbrev-AB2 [GenBank:AB360995]  
AIIIIIIISLPVLAGAITMIIITDRNINTSFFDPAGGGDPILYQHLLFWFFFGHPEVYIILILPGF  
GIVSHIICQESGKKEAFGLVGMYYAIAAIGLLGFIVWAHMMFTVGLDVIDTRAYFTSATMI  
IAVPTGIKIFSWMATMYGTQLNL-TPALLWSLGFVFLFTVGGTGVVLANSSIDIILHDT  
YYV

>C.brevipalpis JAP [GenBank:AB360998]  
AIIIIIIISLPVLAGAITMIIITDRNINTSFFDPAGGGDPILYQHLLFWFFFGHPEVYIILILPGF  
GIVSHVIYNESSKKEAFGLVGMYYAMSTIGLLGFIVWAHMMFTVGMDDIDTRAYFTSATMI  
IAVPTGIKIFSWFASLSGSKFNH-TPALLWSIGFLFLFTVGGTGVVLANSSIDIVLHDT  
YYV

>C.cylindratus JAP1 [GenBank:AB361006]  
AIIIIIIISLPVLAGAITMIIITDRNINTSFFDPAGGGDPILYQHLLFWFFFGHPEVYIILILPGF  
GIVSHIITQESGKNETFGPLGMIYAMTAIGLLGFIVWAHMMFTVGMDDIDTRAYFTSATMV  
IAIPTGIKIFSWIATLQGTQMIF-STSLIWSLGFIFLFTVGGTGVVLANSSIDIILHDT  
YYV

>C.cylindratus JAP2 [GenBank:AB361007]  
AIIIIIIISLPVLAGAITMIIITDRNINTSFFDPAGGGDPILYQHLLFWFFFGHPEVYIILILPGF  
GIVSHIITQESGKNETFGPLGMIYAMTAIGLLGFIVWAHMMFTVGMDDIDTRAYFTSATMV  
IAIPTGIKIFSWIATLQGTQMIF-STSLIWSLGFIFLFTVGGTGVVLANSSIDIILHDT  
YYV

>C.dubius JAP [GenBank:AB361000]  
AIIIIIIISLPVLAGAITMIIITDRNINTSFFDPAGGGDPILYQHLLFWFFFGHPEVYIILILPGF  
GMISHIISQESGKKETFGALGMIYAMLAIGLLGFIVWAHMMFTVGMDDIDTRAYFTSATMI  
IAVPTGIKIFSWLATLHGTQMTL-NPSLWSLGFVFLFTVGGTGVVLANSSIDIVLHDT  
YYV

>C.humeralis JAP1 [GenBank:AB360992]  
AIIIIIIISLPVLAGAITMIIITDRNINTSFFDPAGGGDPILYQHLLFWFFFGHPEVYIILILPGF  
GMISHIISHECGKKETFGALGMIYAMFISIGLLGFIVWAHMMFTVGMDDIDTRAYFTAATMI  
IAVPTGIKIFSWLATLHGAQLNF-SPSILWSLGFVFLFTVGGTGVVLANSSIDIILHDT  
YYV

>C.humeralis JAP2 [GenBank:AB360993]  
AIIIIIIISLPVLAGAITMIIITDRNINTSFFDPAGGGDPILYQHLLFWFFFGHPEVYIILILPGF  
GMISHIISHECGKKETFGALGMIYAMFISIGLLGFIVWAHMMFTVGMDDIDTRAYFTAATMI  
IAVPTGIKIFSWLATLHGAQLNF-SPSILWSLGFVFLFTVGGTGVVLANSSIDIILHDT  
YYV

>C.humeralis JAP3 [GenBank:AB364651]  
AIIIIIIISLPVLAGAITMIIITDRNINTSFFDPAGGGDPILYQHLLFWFFFGHPEVYIILILPGF  
GMISHIISHECGKKETFGALGMIYAMFISIGLLGFIVWAHMMFTVGMDDIDTRAYFTAATMI  
IAVPTGIKIFSWLATLHGAQLNF-SPSILWSLGFVFLFTVGGTGVVLANSSIDIILHDT  
YYV

>C.jacobsoni JAP2 [GenBank:AB360991]  
AVIIIIISLPVLAGAITMIIIMDRNINTSFFDPAGGGDPILYQHLLFWFFFGHPEVYIILILPGF  
GIISHIVLHESGKKIAFGALGMIYAMITIGILGFIVWAHMMFTVGMDDIDTRAYFTSATMI  
IAIPTGIKIFSWIATFQGSNLNL-STSLIWSLGFVFLFTVGGTGVVLANSSIDIVLHDT  
YYV

>C.jacobsoni JAP1 [GenBank:AB360990]  
AVIIIIISLPVLAGAITMIIIMDRNINTSFFDPAGGGDPILYQHLLFWFFFGHPEVYIILILPGF  
GIISHIVLHESGKKIAFGALGMIYAMITIGILGFIVWAHMMFTVGMDDIDTRAYFTSATMI  
IAIPTGIKIFSWIATFQGSNLNL-STSLIWSLGFVFLFTVGGTGVVLANSSIDIVLHDT  
YYV

>C.japonicus JAP1 [GenBank:AB361001]  
AIIIIIIISLPVLAGAITMIIITDRNINTSFFDPAGGGDPILYQHLLFWFFFGHPEVYIILILPGF  
GMISHIISQESGKKETFGALGMIYAMLAIGLLGFIVWAHMMFTVGMDDIDTRAYFTSATMI  
IAVPTGIKIFSWLATLHGTQMTL-NPSLWSLGFVFLFTVGGTGVVLANSSIDIVLHDT  
YYV

>C.japonicus JAP2 [GenBank:AB361002]  
AIIIIIIISLPVLAGAITMIIITDRNINTSFFDPAGGGDPILYQHLLFWFFFGHPEVYIILILPGF  
GMISHIISQESGKKETFGALGMIYAMLAIGLLGFIVWAHMMFTVGMDDIDTRAYFTSATMI  
IAVPTGIKIFSWLATLHGTQMTL-NPSLWSLGFVFLFTVGGTGVVLANSSIDIVLHDT  
YYV

>C.kibunensis JAP1 [GenBank:AB646610]  
AIIIIIIISLPVLAGAITMIIITDRNINTSFFDPAGGGDPILYQHLLFWFFFGHPEVYIILILPGF  
GMISHIISQESGKKETFGSLGMIYAMLAIGLLGFIVWAHMMFTVGMDDIDTRAYFTSATMI

IAVPTGIKIFSWLATLHGTQMTL-NPSLLWLSLGFVFLFTVGGTGVILANSSIDIVLHDT  
 YYV  
 >C.kibunensis JAP2 [GenBank:AB646611]  
 AILLLSLPVLAGAITMLLTDRNINTSFFDPAGGGDPILYQHLFWFFGHPEVYILILPGF  
 GMISHIISQESGKKETFGSLGMIYAMLAIIGLLGFIVWAHMFVGMVDVTRAYFSSATMI  
 IAVPTGIKIFSWLATLHGTQMTL-NPSLLWLSLGFVFLFTVGGTGVILANSSIDIVLHDT  
 YYV  
 >C.maculatus JAP1 [GenBank:AB360986]  
 AILLLSLPVLAGAITMLLTDRNINTSFFDPAGGGDPILYQHLFWFFGHPEVYILILPAF  
 GIISHIIAHESGKKEAFGALAMMYAITTIGLLGFIVWAHMFVGLDVIDTRAYFSSATMV  
 IAVPTGIKIFSWMATLYGAHWKY-TPSLLWALGFIFLFTLGGTGIILANSSIDIVLHDT  
 YYV  
 >C.maculatus JAP2 [GenBank:AB360987]  
 AILLLSLPVLAGAITMLLTDRNINTSFFDPAGGGDPILYQHLFWFFGHPEVYILILPAF  
 GIISHIIAHESGKKEAFGALAMMYAITTIGLLGFIVWAHMFVGLDVIDTRAYFSSATMV  
 IAVPTGIKIFSWMATLYGAHWKY-TPSLLWALGFIFLFTLGGTGIILANSSIDIVLHDT  
 YYV  
 >C.matsuzawai JAP1 [GenBank:AB364649]  
 AILLLSLPVLAGAITMLLTDRNINTSFFDPAGGGDPILYQHLFWFFGHPEVYILILPGF  
 GMISHIISQESGKKETFGALGMIYAMLAIIGLLGFIVWAHMFVGMIDTRAYFSSATMI  
 IAVPTGIKIFSWLATLHGTQMIF-TPQILWLSLGFVFLFTLGGTGVILANSSIDIILHDT  
 YYV  
 >C.matsuzawai JAP2 [GenBank:AB364650]  
 AILLLSLPVLAGAITMLLTDRNINTSFFDPAGGGDPILYQHLFWFFGHPEVYILILPGF  
 GMISHIISQESGKKETFGALGMIYAMLAIIGLLGFIVWAHMFVGMIDTRAYFSSATMI  
 IAVPTGIKIFSWLATLHGTQMIF-TPQILWLSLGFVFLFTLGGTGVILANSSIDIILHDT  
 YYV  
 >C.nipponensis JAP [GenBank:AB360999]  
 AILLLSLPVLAGAITMLLTDRNFNTSFFDPAGGGDPILYQHLFWFFGHPEVYILILPGF  
 GIISHIISHESGKKESEFGNLGMIYAMTTIGLLGFIVWAHMFVGMVDVTRAYFSSATMI  
 IAVPTGIKIFSWLATIYGSQIMFKNPAILWAIGFVFLFTMGGLTGVILANSSIDIVLHDT  
 YYV  
 >C.ohmorii JAP1 [GenBank:AB360976]  
 AILLLSLPVLAGAITMLLTDRNINTSFFDPAGGGDPILYQHLFWFFGHPEVYILILPGF  
 GIISHIISSESGKKESEFGNLGMIYAMTTIGLLGFIVWAHMFVGMVDVTRAYFSSATMI  
 IAVPTGIKIFSWLASMMGSTNRM-TSSTLWALGFIIYFTLGGMTGIILSNAIIDVMLHDT  
 YYV  
 >C.ohmorii JAP2 [GenBank:AB360977]  
 AILLLSLPVLAGAITMLLTDRNINTSFFDPAGGGDPILYQHLFWFFGHPEVYILILPGF  
 GIISHIISSESGKKESEFGNLGMIYAMTTIGLLGFIVWAHMFVGMVDVTRAYFSSATMI  
 IAVPTGIKIFSWLASMMGSTNRM-TSSTLWALGFIIYFTLGGMTGIILSNAIIDVMLHDT  
 YYV  
 >C.oxystoma JAP1 [GenBank:AB360978]  
 AILLLSLPVLAGAITMLLTDRNINTSFFDPAGGGDPILYQHLFWFFGHPEVYILILPGF  
 GMISHIISQESGKKETFGSLGMIYAMLAIIGLLGFIVWAHMFVGMVDVTRAYFSSATMI  
 IAVPTGIKIFSWLATLHGTQMTL-TPSLLWALGFVFLFTVGGTGVILANSSIDIVLHDT  
 YYV  
 >C.oxystoma JAP2 [GenBank:AB360979]  
 AILLLSLPVLAGAITMLLTDRNINTSFFDPAGGGDPILYQHLFWFFGHPEVYILILPGF  
 GMISHIISQESGKKETFGSLGMIYAMLAIIGLLGFIVWAHMFVGMVDVTRAYFSSATMI  
 IAVPTGIKIFSWLATLHGTQMTL-TPSLLWALGFVFLFTVGGTGVILANSSIDIVLHDT  
 YYV  
 >C.oxystom JAP3 [GenBank:AB360980]  
 AILLLSLPVLAGAITMLLTDRNINTSFFDPAGGGDPILYQHLFWFFGHPEVYILILPGF  
 GMISHIISQESGKKETFGSLGMIYAMLAIIGLLGFIVWAHMFVGMVDVTRAYFSSATMI  
 IAVPTGIKIFSWLATLHGTQMTL-TPSLLWALGFVFLFTVGGTGVILANSSIDIVLHDT  
 YYV  
 >C.oxystoma JAP4 [GenBank:AB360981]  
 AILLLSLPVLAGAITMLLTDRNINTSFFDPAGGGDPILYQHLFWFFGHPEVYILILPGF  
 GMISHIISQESGKKETFGSLGMIYAMLAIIGLLGFIVWAHMFVGMVDVTRAYFSSATMI  
 IAVPTGIKIFSWLATLHGTQMTL-TPSLLWALGFVFLFTVGGTGVILANSSIDIVLHDT  
 YYV  
 >C.oxystoma JAP5 [GenBank:AB360982]

AILLSSLPVLAGAITMLLTDRNINTSFFDPAGGGDPILYQHLEWFFGHPEVYILILPGF  
 GMISHIISQESGKKETFGSLGMIYAMLAIIGLLGFIVWAHMFVGMVDVTRAYFTSATMI  
 IAVPTGIKIFSWLATLHGTQMTL-TPSLLWALGFVFLFTVGGTGVILANSSIDIVLHDT  
 YYV  
 >C.oxystoma JAP6 [GenBank:AB360983]  
 AILLSSLPVLAGAITMLLTDRNINTSFFDPAGGGDPILYQHLEWFFGHPEVYILILPGF  
 GMISHIISQESGKKETFGSLGMIYAMLAIIGLLGFIVWAHMFVGMVDVTRAYFTSATMI  
 IAVPTGIKIFSWLATLHGTQMTL-TPSLLWALGFVFLFTVGGTGVILANSSIDIVLHDT  
 YYV  
 >C.oxystoma JAP7 [GenBank:AB360984]  
 AILLSSLPVLAGAITMLLTDRNINTSFFDPAGGGDPILYQHLEWFFGHPEVYILILPGF  
 GMISHIISQESGKKETFGSLGMIYAMLAIIGLLGFIVWAHMFVGMVDVTRAYFTSATMI  
 IAVPTGIKIFSWLATLHGTQMTL-TPSLLWALGFVFLFTVGGTGVILANSSIDIVLHDT  
 YYV  
 >C.oxystoma JAP8 [GenBank:AB360985]  
 AILLSSLPVLAGAITMLLTDRNINTSFFDPAGGGDPILYQHLEWFFGHPEVYILILPGF  
 GMISHIISQESGKKETFGSLGMIYAMLAIIGLLGFIVWAHMFVGMVDVTRAYFTSATMI  
 IAVPTGIKIFSWLATLHGTQMTL-TPSLLWALGFVFLFTVGGTGVILANSSIDIVLHDT  
 YYV  
 >C.peregrinus JAP [GenBank:AB361003]  
 AILLSSLPVLAGAITMLLTDRNINTSFFDPTGGGDPILYQHLEWFFGHPEVYILILPGF  
 GIVSHIMSQESGKKEAFGALGMIYAMTTIGLLGFIVWAHMFVGMVDVTRAYFTSATMI  
 IAIPGTGIKIFSWLATILGSPLSSINPPLMWSLGFVFLFTIGGLTGIILANSSIDTVLHDT  
 YYV  
 >C.pictimargo JAP1 [GenBank:AB646612]  
 AILLSSLPVLAGAITMLLTDRNINTSFFDPAGGGDPILYQHLEWFFGHPEVYILILPGF  
 GMISHIISQESGKKETFGALGMIYAMLAIIGLLGFIVWAHMFVGMVDVTRAYFTSATMI  
 IAVPTGIKIFSWLATLHGTQMTL-NPSLLWSLGFVFLFTVGGTGVILANSSIDIVLHDT  
 YYV  
 >C.pictimargo JAP2 [GenBank:AB646613]  
 AILLSSLPVLAGAITMLLTDRNINTSFFDPAGGGDPILYQHLEWFFGHPEVYILILPGF  
 GMISHIISQESGKKETFGALGMIYAMLAIIGLLGFIVWAHMFVGMVDVTRAYFTSATMI  
 IAVPTGIKIFSWLATLHGTQMTL-NPSLLWSLGFVFLFTVGGTGVILANSSIDIVLHDT  
 YYV  
 >C.punctatus JAP1 [GenBank:AB360988]  
 AILLSSLPVLAGAITMLLTDRNINTSFFDPAGGGDPILYQHLEWFFGHPEVYILILPGF  
 GMISHIIAQESGKKETFGALGMIYAMLAIIGLLGFIVWAHMFVGMVDVTRAYFTSATMI  
 IAVPTGIKIFSWLATLHGTQMNL-NASLLWSLGFVFLFTVGGTGVILANSSIDIVLHDT  
 YYV  
 >C.punctatus JAP2 [GenBank:AB360989]  
 AILLSSLPVLAGAITMLLTDRNINTSFFDPAGGGDPILYQHLEWFFGHPEVYILILPGF  
 GMISHIIAQESGKKETFGALGMIYAMLAIIGLLGFIVWAHMFVGMVDVTRAYFTSATMI  
 IAVPTGIKIFSWLATLHGTQMNL-NASLLWSLGFVFLFTVGGTGVILANSSIDIVLHDT  
 YYV  
 >C.wadai JAP1 [GenBank:AB360996]  
 AILLSSLPVLAGAITMLLTDRNINTSFFDPAGGGDPILYQHLEWFFGHPEVYILILPGF  
 GMISHILSQESGKKETFGALGMIYAMLAIIGLLGFIVWAHMFVGMVDVTRAYFTSATMI  
 IAVPTGIKIFSWLATIYGTQLTL-NASLLWSLGFVFLFTMGGLTGVLANS SIDVVLHDT  
 YYV  
 >C.wadai JAP2 [GenBank:AB360997]  
 AILLSSLPVLAGAITMLLTDRNINTSFFDPAGGGDPILYQHLEWFFGHPEVYILILPGF  
 GMISHILSQESGKKETFGALGMIYAMLAIIGLLGFIVWAHMFVGMVDVTRAYFTSATMI  
 IAVPTGIKIFSWLATIYGTQLTL-NASLLWSLGFVFLFTMGGLTGVLANS SIDVVLHDT  
 YYV  
 >C.wadai JAP3 [GenBank:AB361005]  
 AILLSSLPVLAGAITMLLTDRNINTSFFDPAGGGDPILYQHLEWFFGHPEVYILILPGF  
 GMISHILSQESGKKETFGALGMIYAMLAIIGLLGFIVWAHMFVGMVDVTRAYFTSATMI  
 IAVPTGIKIFSWLATIYGTQLTL-NASLLWSLGFVFLFTMGGLTGVLANS SIDVVLHDT  
 YYV  
 >Anopheles gambiae [GenBank:Nc\_002084][1991..2537]  
 AVLLSSLPVLAGAITMLLTDRNLNTSFFDPAGGGDPILYQHLEWFFGHPEVYILILPGF  
 GMISHIITQESGKKETFGNLGMIYAMLAIIGLLGFIVWAHMFVGMVDVTRAYFTSATMI  
 IAVPTGIKIFSWLATLHGTQLTY-SPAMLWAFGFVFLFTVGGTGVVLANS SIDIVLHDT

YYV

>Anopheles quadriannulatus [GenBank:DQ792581]

AVLLLLSLPVLGAIITMLLTDRNLNNTSFFDPAGGGDPILYQHLEWFFFGHPEVYILILPGF  
GMISHIITQESGKKETFGNLGMIYAMLAIIGLLGFIVWAHMFVTVGMDVDTRAYFTSATMI  
IAVPTGIKIFSWLATLHGTQLTY-SPAMLWAFGFVFLFTVGGLTGVVLANSSIDIVLHDT  
YYV

>Anopheles dirus\_D [GenBank:AJ877572]

AIVLLLLSLPVLGAIITMLLTDRNLNNTSFFDPAGGGDPILYQHLEWFFFGHPEVYILILPGF  
GMISHIITQESGKKETFGNLGMIYAMLAIIGLLGFIVWAHMFVTVGMDVDTRAYFTSATMI  
IAVPTGIKIFSWLATLHGTQLTY-SPAMLWAFGFVFLFTVGGLTGVVLANSSIDIVLHDT  
YYV

>Anopheles janconnae [GenBank:HQ335348]

AVLLLLSLPVLGAIITMLLTDRNLNNTSFFDPAGGGDPILYQHLEWFFFGHPEVYILILPGF  
GMISHIITQESGKKETFGNLGMIYAMLAIIGLLGFIVWAHMFVTVGMDVDTRAYFTSATMI  
IAVPTGIKIFSWLATLHGTQLTY-SPAMLWAFGFVFLFTVGGLTGVVLANSSIDIVLHDT  
YYV
